# An enriched environment reestablishes metabolic homeostasis by reducing obesity-induced inflammation

Sol Díaz de León-Guerrero<sup>1</sup>, Jonathan Salazar-León<sup>1</sup>, Karla F. Meza-Sosa<sup>1</sup>, David Valle-García<sup>1</sup>, Diana Aguilar-León<sup>2</sup>, Gustavo Pedraza-Alva<sup>1</sup> and Leonor Pérez-Martínez<sup>1\*</sup>

<sup>1</sup>Laboratorio de Neuroinmunobiología, Departamento de Medicina Molecular y Bioprocesos, Instituto de Biotecnología, Universidad Nacional Autónoma de México (UNAM), Cuernavaca, Morelos, CP 62210, México.

<sup>2</sup>Departamento de Patología, Instituto Nacional de Ciencias Médicas y Nutrición “Salvador Zubirán”, Tlalpan, Ciudad de México, CP 14000, México.

\*Correspondence: Leonor Pérez-Martínez, Departamento de Medicina Molecular y Bioprocesos, Instituto de Biotecnología, UNAM, A.P. 510-3, Cuernavaca, Morelos, CP 62210, México. Tel. (5255) 5 6227658. E-mail: leonor@ibt.unam.mx. ORCID identifier: 0000-0003-4163-1653.

**Keywords:** Obesity, enriched environment, inflammation, metabolism

## Summary Statement

An enriched environment decreases inflammation in the adipose tissue and in the hypothalamus, reestablishing glucose metabolism in metabolically compromised mice.

## Abstract

Obesity can lead to chronic inflammation in different tissues including the adipose tissue, liver, pancreas, and brain. This inflammatory process generates insulin and leptin resistance, as well as alterations in glucose and lipid metabolism, leading to the development of degenerative diseases including type II diabetes. Additionally, the inhibition of inflammatory signaling can prevent the development of obesity and restore insulin sensitivity. Different studies have shown that an enriched environment (EE) has beneficial effects on learning and memory via enhancing central

nervous system activity. Housing in an EE also regulates the differentiation and activation of immune cells and reduces inflammation in different disease models. Therefore, in the current study we explore whether an EE is capable of restoring energy balance in obese mice that previously presented metabolic alterations. We discovered that an EE improved glucose metabolism, increased insulin signaling in the liver, and reduced hepatic steatosis in mice fed with high-fat diet (HFD). Furthermore, the EE reduced the number of infiltrating macrophages and the levels of inflammatory cytokines in the white adipose tissue (WAT), and increased the production of anti-inflammatory cytokines, lipolysis, and browning in the WAT of HFD-fed mice. Finally, we found reduced inflammatory signaling and increased anorexigenic signaling in the hypothalamus of HFD-fed mice exposed to an EE. These data indicate that an EE is able to restore the metabolic imbalance caused from HFD feeding. Thus, we propose EE as a novel therapeutic approach to treat obesity-related metabolic alterations.

## **Introduction**

Obesity has become an increasing worldwide health issue over the past years; in some countries it accounts for over 20% of the adult population (OECD, 2017). Obesity is of clinical interest as it is linked with an increased risk of developing other pathologies such as cardiovascular and neurodegenerative diseases, cancer, and type II diabetes (Hotamisligil, 2006). Different studies have shown that obesity is accompanied by a low grade, chronic inflammatory state that has been described in different tissues and organs including pancreas, skeletal muscle, adipose tissue, liver and brain (Lumeng and Saltiel, 2011). In adipose tissue an excess in energy intake generates cellular stress, which induces the expression of cytokines and chemokines that lead to the recruitment and activation of different immune cells, mainly macrophages (Gregor and Hotamisligil, 2011). This inflammatory process impairs normal adipose tissue function by inhibiting catecholamine and insulin signaling (Reilly and Saltiel, 2017). In the liver, obesity induces lipid accumulation and the activation of different inflammatory pathways which contribute to insulin resistance and a dysregulation in both glucose and lipid metabolisms (Koyama and Brenner, 2017). Different studies have shown that an inflammatory process is determinant in impairing insulin signaling (de Luca and Olefsky, 2008). Accordingly, inhibition of the IKK/NF- $\kappa$ B, JNK and inflammasome pathways can prevent weight gain and restore insulin sensitivity in different obesity models (Hirosumi et al., 2002; Vandanmagsar et al., 2011;

Yuan et al., 2001). In this regard, anti-inflammatory therapies have been proposed to treat type II diabetes (Goldfine and Shoelson, 2017).

Recently, this inflammatory process has also been described in the brain. The hypothalamus is the brain region responsible of regulating energy balance by sensing the nutritional state of the body (Remmers and Deleamarre-van de Waal, 2011). In the hypothalamus, high levels of insulin and leptin activate the anorexigenic pathways, while inhibiting orexigenic signaling, to decrease food intake and increase energy expenditure (Morton et al., 2006). Both genetic and diet-induced obesity (DIO) generate an inflammatory process in the hypothalamus, characterized by activated JNK and IKK/NF- $\kappa$ B pathways, as well as by increased expression of inflammatory cytokines (Belgardt et al., 2010; De Souza et al., 2005; Zhang et al., 2008). This inflammatory process leads to leptin and insulin resistance, and even neuronal death, impairing the capacity of the hypothalamus to maintain homeostasis (Jais and Brüning, 2017). Nevertheless, studies have shown that the deletion of JNK1 and IKK $\beta$  in neurons can rescue leptin and insulin signaling in the hypothalamus, as well as reduce weight gain and restore the metabolic alterations linked to obesity (Belgardt et al., 2010; Sabio et al., 2010; Zhang et al., 2008).

Looking for therapeutic strategies that could have an effect on the brain and the inflammatory response we decided to study an enriched environment (EE) paradigm. The EE consists of housing conditions that promote increased cognitive, sensory and motor stimuli, as well as social interaction, which lead to the activation of different brain regions (Nithianantharajah and Hannan, 2006). The effects of an EE on brain function have been widely studied and include improved learning and memory, increased long term potentiation, induction of neurotrophin expression, and increased adult neurogenesis (Sampedro-Piquero and Begega, 2017). Different studies have also shown that an EE ameliorates the development of neurodegenerative disorders and decreases inflammation in the brain (Laviola et al., 2008). Exposure to an EE decreases the levels of cytokines and chemokines in the hippocampus in response to lipopolysaccharide (LPS) injection (Williamson et al., 2012). The EE has also been shown to decrease the expression of inflammatory markers in microglia and brain macrophages in a model of glucocorticoid-induced depression (Chabry et al., 2015). Housing in EE conditions also decreases brain damage generated during experimental autoimmune encephalomyelitis by regulating T cell development and function (Xiao et al., 2019).

Although most of the effects of an EE have been studied in the brain, it has also been shown to have beneficial effects outside the central nervous system, where it can alter the levels of different hormones (such as corticosterone, testosterone and oxytocin) and modulate the activation and function of the immune system in different models (Bakos et al., 2009; Marashi et al., 2003). Exposure to an EE has been shown to alter the proliferation and differentiation of T cells, B cells and natural killer (NK) cells (Gurfein et al., 2017; Meng et al., 2019; Xiao et al., 2019). An EE can also prevent immune cell senescence of macrophages, lymphocytes and NK cells, improving their function in aging mice (Arranz et al., 2010). Additionally, the EE can also have anti-tumoral effects mediated by both NK and CD8 T cells (Song et al., 2017; Xiao et al., 2016). In relation to obesity, previous studies have shown that an EE prevents weight gain in a model of Diet-Induced Obesity (DIO) by increasing hypothalamic Brain Derived Neurotrophic Factor (BDNF) levels, adrenergic signaling, and adipose tissue browning (Cao et al., 2011). Given this background, we sought to determine if an EE could have beneficial effects in mice that previously presented metabolic alterations using a model of DIO. We found that housing obese mice, fed with high-fat diet (HFD), in an EE, reduced fasting glucose levels, improved glucose tolerance and insulin sensitivity. EE exposure increased insulin signaling and reduced hepatic steatosis in the liver of HFD-fed mice. We also observed that an EE decreased macrophage infiltration and inflammatory mediators, but increased anti-inflammatory cytokines, lipolysis, and browning markers in the adipose tissue of mice fed with HFD. Exposure to an EE also increased anorexigenic signals and decreased inflammatory proteins in the hypothalamus. These results point to a therapeutic effect of EE housing in metabolically compromised mice by alleviating inflammation in the adipose tissue and hypothalamus, thus restoring insulin signaling. Importantly, the therapeutic effect of the EE was observed even though mice were constantly fed with HFD.

## Results

### **Enriched environment housing ameliorates the metabolic alterations caused by a high fat diet and improves insulin sensitivity**

C57BL/6N mice were housed in standard housing conditions and fed for 13 weeks with either normal diet (ND), as a control group, or with high-fat diet (HFD) to generate DIO. As expected, mice fed with HFD had increased weight from week 3 to week 13 compared to those fed with

ND (Fig. 1A-B), which correlated with a higher caloric intake ( $72 \pm 3.446$  kcal/week ND group vs  $98.51 \pm 10.61$  kcal/week HFD group) per week (Fig. 1C). Additionally, HFD-fed mice had higher fasting glucose levels ( $146.2 \pm 18.25$  mg/dL ND group vs  $231.1 \pm 46.03$  mg/dL HFD group) (Fig. 1D) and presented glucose intolerance (Fig. 1E-F) and insulin resistance (Fig. G-H), which is consistent with previous reports (Collins et al., 2004; Luo et al., 1998).

To determine whether an EE is capable of ameliorating the metabolic alterations observed in these obese mice, we divided the mice to be kept in standard housing conditions (ND Control and HFD Control groups) or to be housed in an enriched environment (ND Enriched and HFD Enriched groups) (Fig. 2A). Mice were maintained on the same diet they had before the switch in housing conditions for an additional 3 months to evaluate weight gain, food intake, and perform metabolic tests. To elucidate whether the EE modulates the metabolic alterations in a time-dependent manner, we included a HFD group exposed to the EE for only 5 weeks before euthanasia, making two HFD Enriched groups: HFD Enriched 1M and HFD Enriched 3M (Fig. 2A)

Mice fed with a ND and maintained either in control housing conditions (ND Control) or in EE (ND Enriched) presented very similar weight throughout the experiment (Final weight:  $33.06 \pm 4.493$  gr ND Control vs  $28.89 \pm 2.775$  gr ND Enrich) (Fig. 2B-C), which correlated with similar energy intake between both groups ( $72.93 \pm 7.414$  kcal/week ND control vs  $70.72 \pm 5.054$  kcal/week ND Enriched) (Fig. 2D). We also observed no differences in the levels of fasting glucose ( $162.1 \pm 13.32$  mg/dL ND Control vs  $150.5 \pm 8.6$  mg/dL ND Enriched) (Fig. 2E), or serum insulin levels ( $1.149 \pm 0.2166$  ng/mL ND Control vs  $0.4039 \pm 0.4755$  ng/mL ND Enriched) (Fig. 2F) when comparing both ND-fed groups. Accordingly, we observed that mice fed with a ND had normal glucose tolerance (Fig. 2G-H) and insulin sensitivity (Fig. 2I-J), showing no difference between both housing conditions at the end of the experiment. However, comparing the data of only the ND-fed mice before the change in housing conditions (ND) with the results collected at the end of the experiment (ND Control and ND Enriched) we found that ND Control mice gained weight (Fig. S1A left panel) without any change in food intake (Fig. S1B left panel) had a small increase in fasting glucose levels (Fig S1C left panel), but showed similar glucose tolerance (Fig. S1D) and a diminished insulin response with aging (Fig S1G), which was not observed in the ND Enriched group. These results suggest that EE maintains metabolic homeostasis even in ND-fed mice.

On the other hand, the HFD Control group gained weight along the entire experiment (Fig. 2B). Mice fed with HFD and switched to an EE had an initial weight loss in both groups (HFD Enriched 1M and HFD Enriched 3M) (Fig. 2B), but surprisingly, the HFD Enriched 3M group reached the same weight as the HFD Control group after 25 experimental weeks ( $47.03 \pm 4.727$  gr HFD Control vs  $46.38 \pm 2.25$  gr HFD Enriched 3M) (Fig. 2C) even though they had lower weekly energy intake ( $79.24 \pm 8.85$  kcal HFD Enrich 3M vs  $90.38 \pm 2.71$  kcal HFD Control) (Fig. 2D). The HFD Enriched 1M group had a lower final weight compared to both the HFD Enriched 3M and the HFD Control groups ( $35.35 \pm 8.37$  gr HFD Enriched 1M) at week 18 (Fig. 2C), which correlated with lower caloric intake ( $61.88 \pm 6.88$  kcal HFD Enriched 1M) (Fig. 2D). Even though both HFD Control and HFD Enriched 3M groups presented the same weight at the end of the experiment, we identified differences in several metabolic parameters between these groups. We observed that both HFD Enriched groups had lower fasting glucose levels when compared to the HFD Control group ( $226.3 \pm 36.51$  mg/dL HFD Control vs  $176.1 \pm 18.86$  mg/dL HFD Enriched 1M, and  $181.7 \pm 29.34$  mg/dL HFD Enriched 3M) (Fig. 2E). Still, there was no difference in serum insulin levels with respect to the HFD Control group ( $2.488 \pm 0.8924$  ng/mL HFD Control vs  $1.217 \pm 0.1501$  ng/mL HFD Enriched 3M), although the insulin levels in the HFD Enriched 3M mice were similar to those observed in the ND Control group (Fig. 2F). Accordingly, both HFD Enriched groups had improved glucose tolerance compared to the HFD Control group, where the HFD Enriched 1M group and the ND groups had a similar response in the glucose tolerance test (Fig. 2G-H). In the insulin resistance test we found lower glucose levels in the HFD Enriched 3M group compared to the HFD Control group (Fig. 2I). This decrement was particularly evident at the first 2 time points (T=0 and 15 minutes) after the insulin injection compared to the HFD Control group, suggesting that mice housed in EE for 3 months had increased insulin sensitivity (Fig. 2I). Comparing the data obtained from the HFD-fed mice before the change in housing conditions (HFD) and at the end of the experiment (HFD Control, HFD Enriched 1M and HFD Enriched 3M), we observed that both the HFD Control and the HFD Enriched 3M mice gained weight compared to the HFD-fed mice at 13 weeks, while the HFD Enriched 1M mice lost weight (Fig. S1A right panel). Additionally, both EE groups (HFD Enriched 1M and HFD Enriched 3M) showed decreased food intake and fasting glucose levels (Fig. S1B-C right panels), while the HFD Enriched 1M group had improved glucose tolerance (Fig. S1E, S1F right panel) and the HFD Enriched 3M group presented higher insulin sensitivity

(Fig. S1H, S1I right panel) compared to the HFD-fed mice before the change in housing conditions. These data indicate that our EE conditions restore the metabolic alterations in metabolically compromised mice fed with HFD.

To further determine the effects of EE housing on insulin sensitivity, we analyzed the activation of the insulin signaling pathway in the liver (Fig. 2K). Previous studies have shown that a HFD feeding inhibits insulin signaling in different tissues by reducing AKT phosphorylation (p-AKT) (Sabio et al., 2008), an important component of the insulin signaling pathway. As expected, we observed that the administration of a HFD reduced p-AKT levels in the liver compared to the ND Control group (Fig. 2L). Importantly, we found that the exposure to an EE increased the levels of p-AKT in the liver after 1 month in EE (HFD Enriched 1M), but this increase was lost after a 3 months exposure to the EE (HFD Enriched 3M) (Fig. 2L). Interestingly, increased p-AKT levels correlated with higher levels of the beta subunit of the insulin receptor (IR $\beta$ ) in the HFD Enriched 1M group (Fig. 2M). Together, these data indicate that an EE is capable of reestablishing insulin signaling in the liver and improving glucose metabolism in obese mice.

### **An enriched environment reduces the inflammatory process in the adipose tissue of obese mice**

An excess in energy intake generates cellular stress in the adipose tissue, which is accompanied by the secretion of chemokines and cytokines that lead to the recruitment and activation of immune cells and development of a low-grade, chronic inflammatory state in this tissue (Reilly and Saltiel, 2017). To assess whether the effect of an EE on the damage caused by DIO was associated to a reduction in the inflammatory process, we performed histological analyses of epididymal white adipose tissue (WAT) (Fig. 3A). As previously reported (Strissel et al., 2007), we observed increased cell infiltration into the WAT of the HFD Control group compared to that of ND-fed mice (Fig. 3A-C). Interestingly, the area and the number of infiltrated cells into WAT were decreased in both the HFD Enriched 1M and the HFD Enriched 3M groups when compared to the HFD Control group (Fig. 3A-C). Given that macrophage infiltration into the WAT has been reported to commonly occur during obesity (Weisberg et al., 2003), we determined the identity of the infiltrated cells by immunohistochemistry assays using the CD68 and CD163 macrophage markers (Barros et al., 2013) (Fig. 3A). We observed that a HFD induces the recruitment of CD68<sup>+</sup> and CD163<sup>+</sup> macrophages to WAT compared to the ND Control group

(Fig. 3D-E). Interestingly, exposure to the EE significantly reduced the number of CD163<sup>+</sup> macrophages and slightly diminished the number of CD68<sup>+</sup> macrophages in both HFD Enriched groups (Fig. 3D-E). These data indicate that an EE reduces immune cell infiltration and suggest reduced inflammation in the WAT.

To gain more insight into the inflammatory process in the WAT, we determined the secretion profile of different cytokines and chemokines using an antibody array (Fig. S2, Table S1). We observed that levels of several proteins (Leptin, TNF, TNFR1, TNFR2, FASL, IL-2, IL-9, IL-12 p70, CCL2, CCL3, CCL9, CCL11, CCL24, CXCL1, CX3CL1, G-CSF, M-CSF, and CD30L) were increased at least 2-fold in the HFD Control group against the ND Control group (Table S1). Strikingly, we found that many of these inflammatory markers were reduced in the WAT of both HFD Enriched 1M and HFD Enriched 3M mice compared to that of the HFD Control mice (e.g. Leptin, CCL2, CCL9, CCL11, CCL24, IL-2, IL-6, IL-12 p70, TNF, FASL, G-CSF and M-CSF, among others) (Fig. S2, Table S1). These data were further corroborated in epididymal WAT by ELISA assays. We found increased protein levels of the proinflammatory cytokines TNF (Fig. 3F), IL-6 (Fig. 3G) and IL-1 $\beta$  (Fig. 3H) in the WAT of HFD Control mice compared to that of ND-fed mice. Importantly, the EE restored the levels of these inflammatory cytokines to those observed in the WAT of the animals fed with a ND (Fig. 3F-H). TNF levels were significantly reduced in both EE groups compared to the HFD Control mice (Figure 3F) while IL-6 and IL-1 $\beta$  were reduced in the WAT of HFD Enriched 1M mice compared to HFD Control mice (Figure 3G and 3H). We also found reduced levels of the anti-inflammatory cytokines IL-10 (compared to the ND Control group, Figure 3I) and IL-4 (Figure 3J) in epididymal WAT of HFD Control mice. Interestingly, IL-10 was increased in both EE groups compared to the ND Control and HFD Control mice (Figure 3I) in contrast, IL-4 was significantly increased in the WAT of HFD Enriched 3M mice compared to HFD Control mice (Figure 3J). Together, these results demonstrate that the EE reduces the inflammatory process in adipose tissue of HFD-fed mice favoring an anti-inflammatory status.

### **An enriched environment reduces hepatic steatosis, promotes lipolysis in the adipose tissue and induces hypothalamic anorexigenic signals**

HFD feeding has been shown to promote lipid accumulation in the liver leading to non-alcoholic hepatic steatosis (Koyama and Brenner, 2017). We found that EE housing for three months



visibly diminished liver steatosis resulting from HFD feeding in comparison to that observed in the HFD Control mice (Fig. 4A).

WAT serves as the primary depot for lipids in the body. The Hormone-sensitive lipase (HSL) is the rate-limiting enzyme in the hydrolysis of adipose-tissue-stored triglycerides. In response to catecholamines, HSL is phosphorylated and activated via a PKA-dependent mechanism allowing its translocation to lipid droplets (Frühbeck et al., 2014). To further support the idea that exposure to EE improves lipid metabolism, we determined the levels of HSL phosphorylation in the WAT (Fig. 4B). We found that total HSL was reduced in the WAT of HFD Enriched 1M and 3M mice compared to ND-fed mice (Fig. 4C). Looking at HSL activation, we found that the levels of phosphorylated HSL at Ser<sup>660</sup> in WAT were decreased in response to a HFD feeding (Fig. 4D), as previously reported (Gaidhu et al., 2010). Even though total HSL was reduced in HFD Enriched mice, the levels of phosphorylated HSL at Ser<sup>660</sup> were maintained in the WAT of mice in the HFD Enriched 1M and 3M groups compared to the ND Control group (Fig. 4D). These data suggest that an EE decreases lipid accumulation in the liver while maintaining fatty acid lipolysis in adipose tissue of HFD-fed mice, which may contribute to an improved metabolic state.

WAT browning has well known benefits over whole body energy balance, increasing energy expenditure and decreasing weight gain (Boström et al., 2012; Seale et al., 2011). Therefore, we determined whether EE housing is able to induce this process in obese mice that present metabolic alterations by measuring the expression level of different browning markers in WAT (Barneda et al., 2015; Maurer et al., 2015; Pettersen et al., 2019; Seale et al., 2011). Interestingly, exposure to an EE increased the expression of *Cidea* (Cell death inducing DFFA like effector A), *Ucp1* (Uncoupling protein 1) and *Cox7a1* (cytochrome c oxidase subunit) in a time-dependent manner (Fig. 4E-G). *Cidea* and *Ucp1* mRNA levels were increased after a 1-month exposure to the EE by 3.39-fold and 2.89-fold respectively, compared to the HFD Control group (Fig. 4E-F), while similar levels were maintained after 3 months in EE housing. In addition to this, a 3-months exposure to an EE increased *Cox7a1* mRNA levels by 2.08-fold compared to the HFD Control group (Fig. 4G). Also, both HFD Enriched groups presented significantly increased mRNA levels of *Ucp1*, *Cidea*, and *Cox7a1* compared to the mice fed with ND Control mice (Fig. 4E-G), while *Prdm16* (PR/SET Domain 16) was only significantly increased in the HFD

Enriched 3M group (Fig. 4H). These results indicate that an EE induces WAT browning even in mice with obesity, which could reduce the metabolic alterations associated to a HFD feeding. An EE has been shown to promote WAT browning and to increase energy expenditure by inducing the expression of hypothalamic BDNF (Cao et al., 2011). BDNF plays an important role in energy homeostasis by having anorexigenic effects in the hypothalamus (Godar et al., 2011; Rosas-Vargas et al., 2011). Given the effects we observed in the upregulation of WAT browning markers, we examined if under our experimental conditions an EE was also regulating BDNF signaling in the hypothalamus (Fig. 4I). Interestingly, we found increased mature BDNF protein levels in the hypothalamus of mice in the HFD Enriched 1M group (Fig. 4J). However, the unprocessed BDNF precursor (proBDNF) was reduced in all HFD-fed groups compared to the ND Control group (Fig. 4K). Furthermore, we observed increased protein levels of the BDNF receptor tropomyosin receptor kinase B (TRKB) in the HFD Enriched 3M group (Fig. 4L). These results suggest that an EE could enhance BDNF/TRKB signaling in the hypothalamus of HFD fed mice.

In addition to the increased levels of hypothalamic BDNF in response to an EE, the levels of proopiomelanocortin (*Pomc*) transcript levels were significantly upregulated in the hypothalamus of the HFD Enriched 1M mice and showed a slightly increase in mice exposed to EE for 3 months (Fig. 4M). Moreover, the levels of cocaine and amphetamine regulated transcript (*Cart*) were also upregulated by a 3 month exposure to an EE in the hypothalamus (Fig. 4N). The upregulation of BDNF, *Pomc* and *Cart* suggest increased anorexigenic signaling which correlates with the decrease in food intake observed in both HFD Enriched groups (Fig. 2D). So far, these data indicate that an EE is able to revert the metabolic alterations caused by a HFD intake by increasing lipolysis and thermogenic gene expression in WAT, decreasing liver steatosis, and by activating hypothalamic anorexigenic signaling; processes that might lead to the improvement in glucose metabolism observed in our obese mice.

### **An enriched environment reduces inflammatory signaling in the hypothalamus of obese mice**

In the brain, the hypothalamus senses energy levels to regulate food intake and energy expenditure, maintaining energy balance (Morton et al., 2006). However, many studies have observed that the administration of a HFD activates different inflammatory signaling pathways,

such as the IKK/NF- $\kappa$ B and JNK pathways in the hypothalamus, leading to insulin and leptin resistance (Belgardt et al., 2010; Kleinridders et al., 2009; Zhang et al., 2008). Since our data show that enriched housing conditions decreased WAT inflammation, restored food intake and fasting glucose levels, reestablished glucose tolerance, and improved insulin sensitivity in HFD-fed mice, we decided to evaluate the levels of certain components of the insulin signaling pathway in the hypothalamus (Fig. 5A). We did not observe any change in the hypothalamic levels of IR $\beta$  among all experimental groups (Fig. 5B). Even though, we determined that a HFD feeding decreased the levels of p-AKT compared to ND fed mice, we did not observe that the EE rescued AKT activation in the hypothalamus (Fig. 5C). Additionally, we found decreased insulin receptor substrate 1 (IRS1) levels in all mice groups fed with a HFD (Fig. 5D). Since the inflammatory kinases IKK $\beta$  and JNK inhibit insulin signaling via IRS-1 phosphorylation on the serine 307 residue (Aguirre et al., 2002; Gao et al., 2002), we evaluated the levels of this inhibitory IRS-1 phosphorylation (Fig. 5E). Interestingly, we found that exposure to an EE for three months significantly reduced the levels of phosphorylated IRS-1 Ser<sup>307</sup> in the hypothalamus of HFD-fed mice compared to HFD Control mice (Fig. 5E). These observations prompted us to determine the hypothalamic inflammatory status under our experimental conditions (Fig. 5A). Mice fed with HFD and housed in an EE for 3 months (HFD Enriched 3M) showed decreased hypothalamic protein levels of the inflammatory markers IKK $\beta$  (Fig. 5F), NF- $\kappa$ B subunit p65 (Fig. 5G), and JNK p46 isoform (Fig. 5H), compared to HFD Control mice. Levels of the JNK p54 isoform were also reduced in the hypothalamus of the HFD Enriched 3M mice with respect to the HFD Enrich 1M mice (Fig. 5I). Interestingly, the reduction in IRS-1 Ser<sup>307</sup> phosphorylation (Fig. 5E) correlates with lower IKK $\beta$  and JNK protein levels observed in the hypothalamus of obese mice housed for 3 months in the EE (HFD Enrich 3M group) (Fig. 5F, H-I). These results indicate that our EE protocol decreases the inflammatory process in the hypothalamus induced by a HFD, even in metabolically compromised mice. Overall, our study demonstrates that an EE is able to ameliorate the metabolic alterations caused from a HFD feeding. We show that the EE reestablishes the control of energy balance by reducing inflammation in the WAT and in the hypothalamus of obese mice.

## Discussion

During homeostasis, adipose tissue presents an anti-inflammatory state, where adipocytes secrete adiponectin and macrophages show an anti-inflammatory M2 profile (Lumeng et al., 2007; Ouchi et al., 2011; Zeyda et al., 2007). Overnutrition increases the levels of inflammatory molecules such as TNF, IL-6, CCL2 and CCL3 in adipocytes which activate resident macrophages leading to the recruitment of more immune cells (Ouchi et al., 2011). In addition, inflammatory signaling, mediated by cytokines or pattern recognition receptors, activate the JNK and IKK kinases which regulate insulin resistance by phosphorylating IRS which prevents its activation by the insulin receptor (Aguirre et al., 2002; Gao et al., 2002). Using a model of DIO, we confirmed that a HFD feeding increases macrophage recruitment and the levels of proinflammatory cytokines in the WAT, increases lipid accumulation in the liver, and leads to the development of glucose intolerance and insulin resistance in mice.

Previous studies have shown that inhibiting inflammation or promoting an anti-inflammatory state in the adipose tissue can improve the metabolism of obese mice. The deletion of JNK1 in the adipose tissue reduces IL-6 levels preventing insulin resistance and hepatic steatosis in a DIO model (Sabio et al., 2008). Furthermore, promoting macrophage M2 polarization decreases inflammation and increases browning markers in the adipose tissue, reduces hepatic steatosis, and restores glucose tolerance and insulin sensitivity in HFD-fed mice (Zhao et al., 2018). In agreement with these data, we found that exposure to an EE reduces the levels of chemokines involved in immune cells recruitment (such as CCL2, CCL5, CCL9, CCL11, CCL24, CXCL1), as well as pro-inflammatory cytokines such as IL-1 $\beta$ , TNF and IL-6 in the WAT of mice fed with a HFD. These data correlate with a reduced infiltration of CD68<sup>+</sup> and CD163<sup>+</sup> macrophages in the WAT of obese mice housed in our EE conditions. In accordance with these results, we have recently shown that HFD-fed mice with reduced adipose tissue inflammation have improved insulin sensitivity and glucose tolerance (Salazar-León et al., 2019), without changes in weight gain. Moreover, studies in humans have shown that obese patients with insulin sensitivity have reduced macrophage infiltration and chemokine expression in the adipose tissue (Hardy et al., 2012; Klötting et al., 2010). Likewise, it is known that an EE alters the activation of the immune system, promoting an anti-inflammatory phenotype of T cells and macrophages (Chabry et al., 2015; Xiao et al., 2019). In accordance with this, we found that the EE increases the levels of IL-4 and IL-10 in WAT, which favors an M2 and anti-inflammatory milieu in the adipose tissue as

previously described (Ji et al., 2012; Lumeng et al., 2007). This suggests that an EE could skew the activation state of immune cells to favor an anti-inflammatory profile in HFD-fed mice. Still, the presence of other immune cell populations and their activation state in our experimental conditions remains to be determined. Collectively, our results show that an EE could be an effective therapeutic approach against obesity-induced adipose tissue inflammation to restore glucose homeostasis.

Results on the effects of an EE on body weight have been contradictory. While some studies have reported that mice housed in EE and fed with ND present reduced weight (Cao et al., 2011), others have not seen such a difference (Mainardi et al., 2010; Tsai et al., 2002). In our experimental conditions, we did not find a significant difference in the weight or other metabolic parameters between mice fed with a ND in control or EE enriched housing conditions, which could be explained by the absence of running wheels (exercise) in our EE paradigm.

In HFD-fed mice we found that an EE caused weight loss during the first 4 weeks of the change in housing conditions. This effect was probably caused by a decrease in food intake, albeit the influence of increased physical activity might play a role in reducing weight. Nevertheless, we cannot attribute all the beneficial effects of an EE to weight loss given that we observed decreased fasting glucose levels, as well as increased glucose tolerance and insulin sensitivity in obese mice (HFD Enriched 3M group). Still, we found that insulin signaling in the liver was only enhanced in the HFD Enriched 1M group even though we observed an improvement in the glucose tolerance of both HFD Enriched groups (1M and 3M). The increase in glucose clearance observed in the HFD Enriched 3M group could suggest increased glucose effectiveness in our mice (Tonelli et al., 2005), which is known to be impaired in HFD-fed mice (Ahrén and Pacini, 2002). Previous studies have shown that weight loss in mice has rapid effects on insulin sensitivity and inflammation in liver (Schmitz et al., 2016), even though inflammation persists in the adipose tissue for a longer period of time. These findings might explain the increase in insulin signaling we observed in the HFD Enriched 1M group, although other factors could also be influencing the beneficial effects of an EE in the liver. In this regard, a systemic reduction in inflammation (specifically in the adipose tissue, liver, and brain) has been shown to increase insulin signaling in the liver (Arkan et al., 2005; Belgardt et al., 2010; Sabio et al., 2008; Yuan et al., 2001).

Most research has focused on the effect of a complete EE in different pathologies; however, other studies have tried to elucidate the contribution of different components of an EE. In some models, exercise has been shown to account for most of the beneficial effects of the EE (Brenes et al., 2016; Prado Lima et al., 2018). However, other studies have shown that the combination of different components (physical, social or cognitive stimulation) of an EE provide a better effect than each component by itself (Grégoire et al., 2014; Langdon and Corbett, 2012). Accordingly, exercise alone cannot recapitulate the full effects of a complete EE on reducing adiposity or modifying gene expression in the hypothalamus and in different fat depots (Cao et al., 2011). Overall, these data cannot explain how each component of an EE contributes to the beneficial effects observed in our experimental conditions, which would need further characterization. In the adipose tissue, the inflammatory process associated with obesity is able to mediate catecholamine resistance, impairing UCP1 upregulation and HSL phosphorylation (Mowers et al., 2013). Likewise, studies in aged mice have shown that the NOD-like receptor family containing pyrin domain 3 (NLRP3) dependent inflammation in WAT macrophages impairs catecholamine induced lipolysis by increasing catecholamine catabolism genes (Camell et al., 2017). In our model, we observed that a HFD decreased HSL phosphorylation while an EE maintained the levels of phosphorylated HSL, suggesting that an EE sustains WAT lipolysis in obese mice. Previous studies have shown that catecholamine release by the sympathetic nervous system and the activation of the  $\beta$ -adrenergic signaling pathway in adipose tissue promotes browning (Harms and Seale, 2013). WAT browning increases energy expenditure and has beneficial effects on thermogenesis and metabolism (Boström et al., 2012; Seale et al., 2011). In our study, we found that an EE increased the expression of browning markers in the WAT of mice fed with a HFD, including *Ucp1*. This suggests that under our experimental conditions, the EE could enhance catecholamine release or re-establish catecholamine signaling in the WAT to mediate the beneficial effects observed in glucose metabolism. In addition to this, catecholamines can regulate immune function and reduce macrophage inflammatory response (Barnes et al., 2015). These observations, together with our data, raise the question whether reduced inflammation improves catecholamine signaling, or whether increasing catecholaminergic signaling reduces inflammation in the WAT. Further studies are required to test these hypotheses.

Even though we observed increased HSL activation and *Ucp1* expression in the WAT of the HFD Enriched 3M group, these mice gained weight after an initial weight loss after the change in housing conditions. These results suggest that, while there is no inhibition in catecholamine signaling, energy expenditure could still be impaired. Previous studies have shown that the increase in  $\beta$ -adrenergic mediated cellular respiration is diminished in white adipocytes from obese patients (Yehuda-Shnaidman et al., 2010), even though lipolysis was unaffected. Furthermore, stimulation of  $\beta$ -adrenergic receptors in mice with a deficiency of STAT3 in adipocytes increased HSL activation and lipolysis, but not fatty acid utilization and oxygen consumption (Reilly et al., 2020). Further studies are required to clarify the mechanisms regulating the improvement of glucose metabolism even in the presence of weight gain, as well as whether an EE mediates an increase in energy expenditure in HFD-fed mice.

An EE has been shown to promote WAT browning by increasing norepinephrine release mediated by hypothalamic BDNF overexpression (Cao et al., 2011). Within the hypothalamus, BDNF has been shown to be part of the energy balance circuitry by regulating food intake (Bariohay et al., 2005; Xu et al., 2003). Previous studies have reported that an EE increases BDNF in the brain, particularly in the hypothalamus, and that BDNF mediates many of the beneficial effects attributed to an EE (Bakos et al., 2009; Cao et al., 2011; Mainardi et al., 2010; Xiao et al., 2019). In the present study, we observed that a month exposure to an EE increased mature BDNF, while the precursor form of BDNF was reduced. These results suggest that an EE increases BDNF processing which has been previously reported (Cao et al., 2014). However, the increase in mature BDNF levels observed in the HFD Enriched 1M group was not maintained after 3 months, but the browning markers in WAT were still increased. These data suggest that the beneficial effects of an EE on the adipose tissue are mediated by different signaling pathways activated in a time-dependent manner. We propose that a short exposure to an EE induces browning markers in HFD-fed mice by a BDNF-dependent mechanism, while a long exposure might be independent of BDNF signaling or sustained even when BDNF levels are no longer increased.

In the brain obesity leads to an inflammatory process that impairs both insulin and leptin signaling in the hypothalamus, exacerbating obesity (Jais and Brüning, 2017). Accordingly, the inhibition of JNK or IKK/NF- $\kappa$ B signaling in hypothalamic neurons decreases weight gain and

improves insulin signaling in models of DIO models (Belgardt et al., 2010; Benzler et al., 2013; Sabio et al., 2010). Furthermore, inhibiting inflammation can rescue learning and memory in HFD-fed mice (Lu et al., 2011). In this regard, an EE has been shown to restore the cognitive impairment associated to obesity (Gergerlioglu et al., 2016), suggesting that an EE might reduce the inflammatory process in the brain generated by HFD feeding. An EE has also been shown to decrease IL-1 $\beta$  and CD68 expression in the hippocampus, as well as to prevent cognitive decline in aged mice, even in the absence of running wheels (Birch and Kelly, 2019). In the present study, we found that exposure to an EE for three months significantly decreased JNK, IKK and NF- $\kappa$ B protein levels in the hypothalamus of HFD-fed mice, which further indicates that an EE is capable of reducing inflammation in the hypothalamus.

Hypothalamic IKK/NF- $\kappa$ B activation in response to dietary obesity induces neurodegeneration and inhibits neurogenesis, affecting neuronal phenotypes associated to energy balance including the anorexigenic proopiomelanocortin (POMC) neurons (Li et al., 2012; Moraes et al., 2009). Congruently, the implantation of hypothalamic stem cells with impaired IKK/NF- $\kappa$ B signaling in HFD fed mice increases neurogenesis and POMC neuronal differentiation, while reducing body weight, food intake, glucose intolerance and insulin levels (Li et al., 2014). The anorexigenic neurohormone CART has also been implicated in feeding behavior and energy expenditure (Lau et al., 2018). CART colocalizes with POMC in the arcuate nucleus of the hypothalamus, where *Cart* mRNA levels are increased following feeding or increased leptin levels (Elias et al., 1998; Germano et al., 2007). Interestingly, here we report that *Pomc* and *Cart* transcript levels were significantly upregulated in HFD-fed mice exposed to an EE for one and three months, which correlates with a decrease in food intake, glucose intolerance and blood glucose levels in these mice. Therefore, further experiments are required to determine whether an EE regulates *Pomc* and *Cart* expression in different hypothalamic nuclei. These data also raise the question whether an EE promotes neuronal regeneration leading to increased anorexigenic signaling as part of the mechanism to regulate glucose metabolism in obese mice.



There is ample evidence about the beneficial effects of an EE in brain physiology, cognition, and in different disease models in both mice and rats. However, transferring what is known in murine models to treat patients has proven challenging. Some studies have managed to translate the different components of an EE (including physical, cognitive, social, and somatosensorial stimulation) into clinical settings to treat stroke, neurodevelopmental disorders, age-related cognitive decline and neurodegenerative diseases (Ball et al., 2019; Clemenson et al., 2020; McDonald et al., 2018; Pradhan, 2019). In recovering stroke patients, EE has been shown to increase engagement in physical, social or cognitive activities, to improve motor performance, and to diminish depression and anxiety levels (Janssen et al., 2014; Rosbergen et al., 2017; Vive et al., 2020). Furthermore, EE can improve cognition and ameliorate autism symptoms in children with autism (Woo and Leon, 2013; Woo et al., 2015). Based on the present study showing the anti-inflammatory properties of an EE, it would be important to consider the clinical application of an EE to treat obesity-associated inflammation to prevent the development of other pathologies such as cardiovascular and neurodegenerative diseases, cancer, and type II diabetes. The design of sensory therapy rooms using similar components of the EE as those described previously (Ball et al., 2019; Clemenson et al., 2020; McDonald et al., 2018; Pradhan, 2019) including physical, cognitive (e.g. playing an instrument, reading, listening to podcast, crosswords, puzzles, writing, games), social (e.g. communal socialization, group activities), and somatosensorial (e.g. crafts singing, stimulation, bouncing a ball) stimulation into clinical settings should be considered as a potential intervention to complement current treatment options and lifestyle changes (Glechner et al., 2018) used to treat the metabolic alterations in obese/diabetic patients.

## **Materials and Methods**

### **Animals**

C57BL/6N male mice (6-7 weeks old; ENVIGO) were randomized into standard housing conditions (21 cm width x 29 cm long x 16 cm height per cage, with 5 mice per cage) and fed with either regular chow diet (ND, 30 mice) (2018SX; ENVIGO Teklad Global) or with a high fat diet (HFD, 44 mice) (D12492, Research diets). After 13 weeks, mice were divided to be maintained in the control housing conditions or to be switched to an enriched environment (EE)

keeping them on the same diet forming 5 experimental groups: normal diet control housing (ND Control 15 mice), normal diet enriched environment (ND Enrich 15 mice), high fat diet control housing (HFD Control 15 mice), high fat diet enriched environment 1 month (HFD Enrich 1M 14 mice), and high fat diet enriched environment 3 months (HFD Enrich 3M 15 mice). The mice were distributed between housing conditions groups in a way that minimized the difference in mean weight (for each diet). The EE housing conditions consisted in large cages (32 cm width x 88 cm long x 47.6 cm height per cage; 15 mice per cage) supplemented with plastic tunnels, wood and plastic toys, cardboard boxes, and glass jars. The toys and their locations were changed once a week. Mice were maintained on a normal 12 h/12 h light/dark cycle with the corresponding diet and water *ad libitum*. Body weight of each mouse was recorded weekly. Food intake was recorded as the total food consumption of each cage housing 5 (Control) or 15 (Enrich) mice and represented as the average food intake per mouse per week. Metabolic tests were performed at week 17 for the HFD Enrich 1M mice and at week 25 for the other groups. The animals were sacrificed by CO<sub>2</sub> inhalation after 18 (HFD Enrich 1M) or 26 (ND Control, ND Enrich, HFD Control and HFD Enrich 3M) weeks on the experimental settings, blood and tissue were harvested for further use. The Institutional Bioethical Committee approved all animal experiments described in this study.

### **Glucose and insulin tolerance test**

Glucose tolerance test (GTT) and insulin tolerance test (ITT) were performed at different time points in our experimental conditions to evaluate the effect of diet and environmental conditions on glucose metabolism. 20 mice of each diet group were selected after 11 weeks of a ND or a HFD feeding and divided between the GTT and ITT so that their mean weight was similar between the same diet group (n=10). After the separation in environmental conditions the GTT and ITT were performed after 17 experimental weeks for the HFD Enrich 1M mice (n=5), or after 25 experimental weeks for the other groups (ND Control, ND Enrich, HFD Control and HFD Enrich 3M).

For the GTT and ITT animals were fasted six hours before the test from 8:00 to 14:00. Each mouse received an intraperitoneal injection with glucose (1.8gr/kg) or insulin (Humulin® R, 1U/kg) for the glucose or insulin resistance test, respectively. The concentration of blood glucose

was measured using a Glucometer (Accu-Chek; Roche) at 0, 15-, 30-, 60- and 120-min post-injection.

### **Area under the curve (AUC)**

The AUC for both the insulin tolerance test and glucose tolerance test was calculated using the Tai's formula (Tai, 1994):

$$Area = \frac{1}{2} \sum_{i=1}^n X_i - X_{(i-1)} (Y_{(i-1)} + Y_i)$$

Where X = Time (0, 15, 30, 60, 120 min), and Y= Glucose (mg/dL) levels at each time point.

### **Tissue preparation, serum harvesting and biomarkers measurements**

Tissues were either fixed in 4% paraformaldehyde in phosphate-buffered saline (PBS) and stored at 4°C or stored at -70°C until use. Blood samples, obtained by cardiac puncture, were incubated at 4°C for two hours to promote clot formation, spun at 1,200 rpm for 10 min, the serum was collected and stored at -70°C until use.

The serum from 3 mice of each group was pooled before performing biomarker measurements. Circulating insulin levels were quantified in blood sera by ELISA using the Mouse Insulin ELISA Kit ALPCO (80-INSMS-E01) following manufacturer's protocols (n=3 serum pools per group).

### **Adipose tissue immunohistochemistry**

Epididymal white adipose tissue (WAT) was collected, fixed using 4% paraformaldehyde, and embedded in paraffin. Two µm-thick sections were prepared, deparaffinized in xylene, rehydrated in graded ethanol series and then stained with hematoxylin and eosin. Analysis of adipocyte histology was performed with the ImageJ software according to the manual procedure (Abràmoff et al., 2004). Immune cell infiltration in the adipose tissue was quantified by calculating infiltration ratio of 10 fields (10×) from 3 slides of each individual mouse, with a

total of 5 mice per group. Light microscopic images were acquired using a Nikon Eclipse Ci-L microscope with an Infinity1 Lumenera color camera.

Immunohistochemistry was performed on 2  $\mu\text{m}$ -thick sections deparaffinized in xylene and rehydrated in graded ethanol series. Antigen retrieval was performed by immersing the slides in antigen retrieval buffer (100x citrate buffer, pH 6.0; ab93678 Abcam) for 25 min in boiling water. Endogenous peroxidase activity was inhibited by 3%  $\text{H}_2\text{O}_2$  -methanol treatment for 20 min, and background nonspecific binding was reduced by incubating with 1% fetal bovine serum (FBS) in 1X PBS pH 7.4 for 30 min. Sections were incubated overnight at room temperature with anti-CD163 (1:100 dilution, Invitrogen #14-1631-82) or anti-CD68 (1:150 dilution, Invitrogen #14-0681-82) antibodies. Goat anti-rat HRP secondary antibody (HRP polymer, ab214882, Abcam) was then added for 40 minutes at room temperature. The slides were then washed five times in 1X PBS pH 7.4, and incubated for 30 min at room temperature with streptavidin-HRP. The antigen-antibody complex was visualized by DAB chromogen (ab64238, Abcam). After stopping the reaction with distilled water, the sections were counterstained with hematoxylin, washed in distilled water for five minutes, and dehydrated sequentially in 70%, 90% and 100% ethanol, ethanol/xylene and xylene. The stained sections were visualized using a Nikon Eclipse Ci-L microscope with an Infinity1 Lumenera color camera and analyzed by Image-Pro Express version 6.0 software (Media Cybernetics). Ten randomly selected images per slide from 5 individual mice per group were taken at 20x magnification.

### **Liver histochemistry**

Liver tissue was mounted in Tissue-Tek OCT (Sakura Finetek) and frozen for sectioning. Liver slides were stained with hematoxylin and eosin. Ten images, randomly selected per slide from 3 individual mice per group, were taken at 20x magnification to visualize lipid droplets. Light microscopic images were acquired using a Zeiss LSM510/UV Axiovert 200M confocal microscope with a Nikon COOLPIX 5000 camera.

## Protein extracts

Frozen epididymal adipose tissue was cut into pieces in 400-600  $\mu$ L lysis buffer (20 mM Tris pH 7.4, 137 mM NaCl, 25 mM  $\beta$ -glycerophosphate pH 7.4, 2 mM PPI<sub>Na</sub>, 2 mM EDTA pH 7.4, 1% Triton X-100, 10% glycerol). Samples were incubated on ice for 1 hour, and then centrifuged at 14,500 rpm at 4 °C; the supernatants were recovered and stored at -70 °C. Total protein extracts were quantified by the BCA method.

For liver and hypothalamus, samples were thawed in 300-500  $\mu$ L of lysis buffer (20 mM Tris pH 7.4, 137 mM NaCl, 25 mM  $\beta$ -glycerophosphate pH 7.4, 2 mM PPI<sub>Na</sub>, 2 mM EDTA pH 7.4, 1% Triton X-100, 10% glycerol) supplemented with 1X complete protease inhibitor cocktail (Roche) and the phosphatase inhibitors (200 mM Na<sub>3</sub>VO<sub>4</sub>, 0.1mM DTT, 1mM PMSF). The tissue was sonicated and the homogenate was incubated on ice for 10 min. Samples were spun at 14,500 rpm at 4°C, supernatants were recovered and stored at -70°C. Total protein extracts were quantified by the Bradford method.

## Western blotting

Proteins (15-30  $\mu$ g) were resolved on polyacrylamide gels and transferred to a nitrocellulose membrane (Hybond-ECL, GE Healthcare Life Sciences). The membrane was blocked with 5% skim milk dissolved in TBS-T (20 mM Tris pH 7.5, 150 mM NaCl, 0.1% Tween) at room temperature for one hour and finally incubated with the corresponding primary antibody at 4°C overnight. The secondary antibody coupled to horseradish peroxidase was incubated for one hour at room temperature in 5% milk in TBS-T or 5% BSA in TBS-T. After washing, immune complexes were visualized by chemiluminescence using the ECL Western Lighting detection reagents following manufacturer's instructions. Densitometry analysis was performed using a Gel-Doc™ XR+ (Bio-Rad) and the Image Lab version 6.0.1 software (Bio-Rad) or using a C-DiGit 3600 Blot Scanner (LI-COR Biosciences) and the Image Studio Software Version 5.2.5 (LI-COR Biosciences).

The following antibodies were used: phosphorylated AKT (p-AKT Ser473, 1:1000 dilution; Cell Signaling CS-9271), AKT (1:3000 dilution; Cell Signaling, CS-9272), Insulin receptor  $\beta$  (IR $\beta$ , 1:1000 dilution; Cell Signaling CS-3020), JNK (1:2000 dilution; Cell Signaling CS-9252), IKK $\beta$  (1:1000 dilution; Cell Signaling CS-2370), NF- $\kappa$ B p65 (1:1000 dilution; Cell Signaling CS-4764), IRS-1 (1:1000 dilution; Cell Signaling CS-2382), phosphorylated IRS (p-IRS Ser307,

1:1000 dilution; Cell Signaling CS-2381), BDNF (recognizes the proBDNF and BDNF, 1:1000 dilution; Santa Cruz sc-546), TRKB (1:1000 dilution; Santa Cruz sc-8316), HSL (1:1000 dilution; Cell Signaling, CS-4107), phosphorylated HSL (p-HSL Ser660, 1:1000 dilution; Cell Signaling CS-4126), Actin (1:6000 dilution; Santa Cruz sc-1616).

## **ELISA**

Cytokine levels in the epididymal white adipose tissue were determined from total protein extracts using the IL-1 $\beta$  (Cat. #432605), IL-4 (Cat. #431101), IL-6 (Cat. #431304), IL-10 (Cat. #431414) and TNF (Cat. #430904) ELISA MAX<sup>TM</sup> Deluxe Sets (Biolegend) following the manufacturer's instructions.

## **Adipose tissue inflammatory profile**

Protein extracts from the epididymal white adipose tissue were prepared as described above. The adipose tissue inflammatory profile was determined using the mouse cytokine antibody array C1 RayBio® C-Series (#AAM-INF-1-4). Arrays were probed with 250  $\mu$ g of protein extracts following the manufacturer's instructions. The antibody-antigen interactions were visualized by chemiluminescence using a LI-COR Biosciences instrument. Densitometry was performed using the Image Studio Software Version 5.2.5.

## **RNA extraction, reverse transcription and qPCR**

Total RNA was isolated from epididymal adipose tissue using TRIzol reagent (Thermo Fisher Scientific 15596026) following the manufacturer's instructions except for two additional steps. First, before adding isopropanol, TRIzol:sample homogenate was briefly centrifuged for 1 min at 13,000 rpm and the top lipid layer was discarded from all samples. Second, an extra 100% ethanol wash was performed before the regular 70-75% ethanol washes as suggested by the product's protocol. RNA concentration was determined using a Nanodrop 2000 (Thermo Fisher Scientific). Total RNA (500 ng) of each sample was retrotranscribed using oligo dT, random hexamers (Thermo Fisher Scientific, N8080127), and the thermostable M-MLV Reverse Transcriptase (Thermo Fisher Scientific, 28025013) following manufacturer's directions. At the end of the reverse transcription reaction, 20  $\mu$ L of cDNA were diluted 1:10 in water. Finally, 1  $\mu$ L of each diluted cDNA was used for qPCR assays according to the instructions of the Maxima

SYBR Green/ROX 2X qPCR Master Mix kit (Thermo Fisher Scientific, K0221) with a  $T_m$  of 60°C using a StepOne™ Real-Time PCR system (Thermo Fisher Scientific, 4376357).

For the hypothalamus, total RNA was isolated as previously described (Pérez-Martínez et al., 1998) pooling 2 hypothalamus for each sample. 1 µg of hypothalamic RNA was retrotranscribed using oligo dT and the M-MLV Reverse Transcriptase (Thermo Fisher Scientific, 28025013) following manufacturer's directions.

Primers were designed to specifically recognize and amplify mouse genes in the qPCR assays. All the primers used in this study are listed in Table S2.

### **Statistical analyses**

Data are presented as mean  $\pm$  s.e.m. An unpaired two-tailed t-test was used to compare group pairs. Data were also analyzed by one-way ANOVA followed by a Tukey's post hoc test, and two-way ANOVA followed by Tukey's multiple comparison test or Bonferroni post hoc test. Differences were considered statistically significant with a  $P$ -value  $< 0.05$ . Statistical significance was performed using the GraphPad Prism version 9.0 for Windows (GraphPad software).

### **Acknowledgements**

We thank Oswaldo López-Gutiérrez for technical support; to X. Alvarado at the Laboratorio Nacional de Microscopía Avanzada (UNAM) for image acquisition; to S. Rodríguez at the Unidad de Histología (Instituto de Fisiología Celular-UNAM); to G. Cabeza, and E. Mata for animal care.

### **Funding**

This work was supported by the Dirección General de Asuntos del Personal Académico, Universidad Nacional Autónoma de México [grants numbers: PAPIIT IN213119 and IN213316 to L.P.-M. and IN211719 and IN212316 to G.P.-A.] and by the Consejo Nacional de Ciencia y Tecnología [CONACYT; grants numbers: IFC 2016-2282 and 155290 to L.P.-M. and 154542 to G.P.-A.].

S. D. de L-G. is a PhD student enrolled in the Programa de Doctorado en Ciencias Bioquímicas, Universidad Nacional Autónoma de México (UNAM) and recipient of a CONACYT fellowship (384817).

### **Authors Contribution**

S.D. de L-G., designed and performed the *in vivo* experiments, collected biological material, performed ELISA, executed the Western blot analyses, statistical analysis, and wrote the manuscript. J.S-L. performed ELISA, antibody array and Western blot experiments. J.S-L. and D.A-L. performed the adipose histology, macrophage staining and image analyses. K.F.M-S. and D.V-G. performed RNA extraction, qPCR analyses, analyzed and interpreted the PCR data, and helped draft the manuscript. G.P-A designed, analyzed, and interpreted the data, and wrote the manuscript. L.P-M. conceived, coordinated and supervised the study; designed, analyzed and interpreted the data, and wrote the manuscript.

### **Declaration of Interest**

The authors declare no competing or financial interests.

### **References**

- Abràmoff, M. D., Magalhães, P. J. and Ram, S. J.** (2004). Image processing with ImageJ. *Biophotonics Int.* **11**, 36–42.
- Aguirre, V., Werner, E. D., Giraud, J., Lee, Y. H., Shoelson, S. E. and White, M. F.** (2002). Phosphorylation of Ser307 in insulin receptor substrate-1 blocks interactions with the insulin receptor and inhibits insulin action. *J. Biol. Chem.* **277**, 1531–7.
- Ahrén, B. and Pacini, G.** (2002). Insufficient islet compensation to insulin resistance vs. reduced glucose effectiveness in glucose-intolerant mice. *Am. J. Physiol. - Endocrinol. Metab.* **283**, 738–744.
- Arkan, M. C., Hevener, A. L., Greten, F. R., Maeda, S., Li, Z.-W., Long, J. M., Wynshaw-Boris, A., Poli, G., Olefsky, J. and Karin, M.** (2005). IKK-beta links inflammation to obesity-induced insulin resistance. *Nat. Med.* **11**, 191–8.



- Arranz, L., De Castro, N. M., Baeza, I., Maté, I., Viveros, M. P. and De la Fuente, M.** (2010). Environmental enrichment improves age-related immune system impairment: long-term exposure since adulthood increases life span in mice. *Rejuvenation Res.* **13**, 415–28.
- Bakos, J., Hlavacova, N., Rajman, M., Ondicova, K., Koros, C., Kitraki, E., Steinbusch, H. W. M. and Jezova, D.** (2009). Enriched environment influences hormonal status and hippocampal brain derived neurotrophic factor in a sex dependent manner. *Neuroscience* **164**, 788–97.
- Ball, N. J., Mercado, E. and Orduña, I.** (2019). Enriched Environments as a Potential Treatment for Developmental Disorders: A Critical Assessment. *Front. Psychol.* **10**, 466.
- Bariohay, B., Lebrun, B., Moyse, E. and Jean, A.** (2005). Brain-derived neurotrophic factor plays a role as an anorexigenic factor in the dorsal vagal complex. *Endocrinology* **146**, 5612–20.
- Barneda, D., Planas-Iglesias, J., Gaspar, M. L., Mohammadyani, D., Prasannan, S., Dormann, D., Han, G.-S., Jesch, S. A., Carman, G. M., Kagan, V., et al.** (2015). The brown adipocyte protein CIDEA promotes lipid droplet fusion via a phosphatidic acid-binding amphipathic helix. *Elife* **4**, e07485.
- Barnes, M. A., Carson, M. J. and Nair, M. G.** (2015). Non-traditional cytokines: How catecholamines and adipokines influence macrophages in immunity, metabolism and the central nervous system. *Cytokine* **72**, 210–9.
- Barros, M. H. M., Hauck, F., Dreyer, J. H., Kempkes, B. and Niedobitek, G.** (2013). Macrophage polarisation: an immunohistochemical approach for identifying M1 and M2 macrophages. *PLoS One* **8**, e80908.
- Bartolomucci, A., Cabassi, A., Govoni, P., Ceresini, G., Cero, C., Berra, D., Dadomo, H., Franceschini, P., Dell’Omo, G., Parmigiani, S., et al.** (2009). Metabolic consequences and vulnerability to diet-induced obesity in male mice under chronic social stress. *PLoS One* **4**,.
- Belgardt, B. F., Mauer, J., Wunderlich, F. T., Ernst, M. B., Pal, M., Spohn, G., Brönneke, H. S., Brodesser, S., Hampel, B., Schauss, A. C., et al.** (2010). Hypothalamic and pituitary c-Jun N-terminal kinase 1 signaling coordinately regulates glucose metabolism. *Proc. Natl. Acad. Sci. U. S. A.* **107**, 6028–33.

- Benzler, J., Ganjam, G. K., Legler, K., Stöhr, S., Krüger, M., Steger, J. and Tups, A.** (2013). Acute inhibition of central c-Jun N-terminal kinase restores hypothalamic insulin signalling and alleviates glucose intolerance in diabetic mice. *J. Neuroendocrinol.* **25**, 446–54.
- Birch, A. M. and Kelly, Á. M.** (2019). Lifelong environmental enrichment in the absence of exercise protects the brain from age-related cognitive decline. *Neuropharmacology* **145**, 59–74.
- Boström, P., Wu, J., Jedrychowski, M. P., Korde, A., Ye, L., Lo, J. C., Rasbach, K. A., Boström, E. A., Choi, J. H., Long, J. Z., et al.** (2012). A PGC1- $\alpha$ -dependent myokine that drives brown-fat-like development of white fat and thermogenesis. *Nature* **481**, 463–8.
- Bradley, R. L., Jeon, J. Y., Liu, F.-F. and Maratos-Flier, E.** (2008). Voluntary exercise improves insulin sensitivity and adipose tissue inflammation in diet-induced obese mice. *AJP Endocrinol. Metab.* **295**, E586–E594.
- Brenes, J. C., Lackinger, M., Höglinger, G. U., Schratt, G., Schwarting, R. K. W. and Wöhr, M.** (2016). Differential effects of social and physical environmental enrichment on brain plasticity, cognition, and ultrasonic communication in rats. *J. Comp. Neurol.* **524**, 1586–1607.
- Camell, C. D., Sander, J., Spadaro, O., Lee, A., Nguyen, K. Y., Wing, A., Goldberg, E. L., Youm, Y.-H., Brown, C. W., Elsworth, J., et al.** (2017). Inflammasome-driven catecholamine catabolism in macrophages blunts lipolysis during ageing. *Nature* **550**, 119–123.
- Cao, L., Choi, E. Y., Liu, X., Martin, A., Wang, C., Xu, X. and During, M. J.** (2011). White to brown fat phenotypic switch induced by genetic and environmental activation of a hypothalamic-adipocyte axis. *Cell Metab.* **14**, 324–38.
- Cao, W., Duan, J., Wang, X., Zhong, X., Hu, Z., Huang, F., Wang, H., Zhang, J., Li, F., Zhang, J., et al.** (2014). Early enriched environment induces an increased conversion of proBDNF to BDNF in the adult rat's hippocampus. *Behav. Brain Res.* **265**, 76–83.
- Chabry, J., Nicolas, S., Cazareth, J., Murriss, E., Guyon, A., Glaichenhaus, N., Heurteaux, C. and Petit-Paitel, A.** (2015). Enriched environment decreases microglia and brain macrophages inflammatory phenotypes through adiponectin-dependent mechanisms: Relevance to depressive-like behavior. *Brain. Behav. Immun.* **50**, 275–287.

- Clemenson, G. D., Stark, S. M., Rutledge, S. M. and Stark, C. E. L.** (2020). Enriching hippocampal memory function in older adults through video games. *Behav. Brain Res.* **390**, 112667.
- Collins, S., Martin, T. L., Surwit, R. S. and Robidoux, J.** (2004). Genetic vulnerability to diet-induced obesity in the C57BL/6J mouse: physiological and molecular characteristics. *Physiol. Behav.* **81**, 243–8.
- de Luca, C. and Olefsky, J. M.** (2008). Inflammation and insulin resistance. *FEBS Lett.* **582**, 97–105.
- De Souza, C. T., Araujo, E. P., Bordin, S., Ashimine, R., Zollner, R. L., Boschero, A. C., Saad, M. J. a and Velloso, L. a** (2005). Consumption of a fat-rich diet activates a proinflammatory response and induces insulin resistance in the hypothalamus. *Endocrinology* **146**, 4192–9.
- Elias, C. F., Lee, C., Kelly, J., Aschkenasi, C., Ahima, R. S., Couceyro, P. R., Kuhar, M. J., Saper, C. B. and Elmquist, J. K.** (1998). Leptin activates hypothalamic CART neurons projecting to the spinal cord. *Neuron* **21**, 1375–85.
- Frühbeck, G., Méndez-Giménez, L., Fernández-Formoso, J.-A., Fernández, S. and Rodríguez, A.** (2014). Regulation of adipocyte lipolysis. *Nutr. Res. Rev.* **27**, 63–93.
- Gaidhu, M. P., Anthony, N. M., Patel, P., Hawke, T. J. and Ceddia, R. B.** (2010). Dysregulation of lipolysis and lipid metabolism in visceral and subcutaneous adipocytes by high-fat diet: role of ATGL, HSL, and AMPK. *Am. J. Physiol. Cell Physiol.* **298**, C961-71.
- Gao, Z., Hwang, D., Bataille, F., Lefevre, M., York, D., Quon, M. J. and Ye, J.** (2002). Serine phosphorylation of insulin receptor substrate 1 by inhibitor kappa B kinase complex. *J. Biol. Chem.* **277**, 48115–21.
- Gergerlioglu, H. S., Oz, M., Demir, E. A., Nurullahoglu-Atalik, K. E. and Yerlikaya, F. H.** (2016). Environmental enrichment reverses cognitive impairments provoked by Western diet in rats: Role of corticosteroid receptors. *Life Sci.* **148**, 279–85.
- Germano, C. M. R., de Castro, M., Rorato, R., Laguna, M. T. C., Antunes-Rodrigues, J., Elias, C. F. and Elias, L. L. K.** (2007). Time course effects of adrenalectomy and food intake on cocaine- and amphetamine-regulated transcript expression in the hypothalamus. *Brain Res.* **1166**, 55–64.

- Glechner, A., Keuchel, L., Affengruber, L., Titscher, V., Sommer, I., Matyas, N., Wagner, G., Kien, C., Klerings, I. and Gartlehner, G.** (2018). Effects of lifestyle changes on adults with prediabetes: A systematic review and meta-analysis. *Prim. Care Diabetes* **12**, 393–408.
- Godar, R., Dai, Y., Bainter, H., Billington, C., Kotz, C. M. and Wang, C. F.** (2011). Reduction of high-fat diet-induced obesity after chronic administration of brain-derived neurotrophic factor in the hypothalamic ventromedial nucleus. *Neuroscience* **194**, 36–52.
- Goldfine, A. B. and Shoelson, S. E.** (2017). Therapeutic approaches targeting inflammation for diabetes and associated cardiovascular risk. *J. Clin. Invest.* **127**, 83–93.
- Grégoire, C.-A., Bonenfant, D., Le Nguyen, A., Aumont, A. and Fernandes, K. J. L.** (2014). Untangling the influences of voluntary running, environmental complexity, social housing and stress on adult hippocampal neurogenesis. *PLoS One* **9**, e86237.
- Gregor, M. F. and Hotamisligil, G. S.** (2011). Inflammatory mechanisms in obesity. *Annu. Rev. Immunol.* **29**, 415–45.
- Gurfein, B. T., Hasdemir, B., Milush, J. M., Touma, C., Palme, R., Nixon, D. F., Darcel, N., Hecht, F. M. and Bhargava, A.** (2017). Enriched environment and stress exposure influence splenic B lymphocyte composition. *PLoS One* **12**, e0180771.
- Hardy, O. T., Perugini, R. A., Nicoloro, S. M., Gallagher-Dorval, K., Puri, V., Straubhaar, J. and Czech, M. P.** (2012). Body mass index-independent inflammation in omental adipose tissue associated with insulin resistance in morbid obesity. *Surg. Obes. Relat. Dis.* **7**, 60–7.
- Harms, M. and Seale, P.** (2013). Brown and beige fat: development, function and therapeutic potential. *Nat. Med.* **19**, 1252–63.
- Hirosumi, J., Tuncman, G., Chang, L., Görgün, C. Z., Uysal, K. T., Maeda, K., Karin, M. and Hotamisligil, G. S.** (2002). A central role for JNK in obesity and insulin resistance. *Nature* **420**, 333–6.
- Hotamisligil, G. S.** (2006). Inflammation and metabolic disorders. *Nature* **444**, 860–7.
- Jais, A. and Brüning, J. C.** (2017). Hypothalamic inflammation in obesity and metabolic disease. *J. Clin. Invest.* **127**, 24–32.

- Janssen, H., Ada, L., Bernhardt, J., McElduff, P., Pollack, M., Nilsson, M. and Spratt, N. J.** (2014). An enriched environment increases activity in stroke patients undergoing rehabilitation in a mixed rehabilitation unit: A pilot non-randomized controlled trial. *Disabil. Rehabil.* **36**, 255–262.
- Ji, Y., Sun, S., Xu, A., Bhargava, P., Yang, L., Lam, K. S. L., Gao, B., Lee, C.-H., Kersten, S. and Qi, L.** (2012). Activation of natural killer T cells promotes M2 Macrophage polarization in adipose tissue and improves systemic glucose tolerance via interleukin-4 (IL-4)/STAT6 protein signaling axis in obesity. *J. Biol. Chem.* **287**, 13561–71.
- Jocken, J. W. E. and Blaak, E. E.** (2008). Catecholamine-induced lipolysis in adipose tissue and skeletal muscle in obesity. *Physiol. Behav.* **94**, 219–230.
- Kleinridders, A., Schenten, D., Könner, a C., Belgardt, B. F., Mauer, J., Okamura, T., Wunderlich, F. T., Medzhitov, R. and Brüning, J. C.** (2009). MyD88 signaling in the CNS is required for development of fatty acid-induced leptin resistance and diet-induced obesity. *Cell Metab.* **10**, 249–59.
- Klötting, N., Fasshauer, M., Dietrich, A., Kovacs, P., Schön, M. R., Kern, M., Stumvoll, M. and Blüher, M.** (2010). Insulin-sensitive obesity. *Am. J. Physiol. Endocrinol. Metab.* **299**, E506-15.
- Koyama, Y. and Brenner, D. A.** (2017). Liver inflammation and fibrosis. *J. Clin. Invest.* **127**, 55–64.
- Langdon, K. D. and Corbett, D.** (2012). Improved working memory following novel combinations of physical and cognitive activity. *Neurorehabil. Neural Repair* **26**, 523–532.
- Lau, J., Farzi, A., Qi, Y., Heilbronn, R., Mietzsch, M., Shi, Y. C. and Herzog, H.** (2018). CART neurons in the arcuate nucleus and lateral hypothalamic area exert differential controls on energy homeostasis. *Mol. Metab.* **7**, 102–118.
- Laviola, G., Hannan, A. J., Macrì, S., Solinas, M. and Jaber, M.** (2008). Effects of enriched environment on animal models of neurodegenerative diseases and psychiatric disorders. *Neurobiol. Dis.* **31**, 159–68.
- Li, J., Tang, Y. and Cai, D.** (2012). IKK $\beta$ /NF- $\kappa$ B disrupts adult hypothalamic neural stem cells to mediate a neurodegenerative mechanism of dietary obesity and pre-diabetes. *Nat. Cell Biol.* **14**, 999–1012.

- Li, J., Tang, Y., Purkayastha, S., Yan, J. and Cai, D.** (2014). Control of obesity and glucose intolerance via building neural stem cells in the hypothalamus. *Mol. Metab.* **3**, 313–24.
- Liao, G.-Y., Li, Y. and Xu, B.** (2013). Ablation of TrkB expression in RGS9-2 cells leads to hyperphagic obesity. *Mol. Metab.* **2**, 491–7.
- Lu, J., Wu, D., Zheng, Y., Hu, B., Cheng, W., Zhang, Z. and Shan, Q.** (2011). Ursolic acid improves high fat diet-induced cognitive impairments by blocking endoplasmic reticulum stress and I $\kappa$ B kinase  $\beta$ /nuclear factor- $\kappa$ B-mediated inflammatory pathways in mice. *Brain. Behav. Immun.* **25**, 1658–67.
- Lumeng, C. N. and Saltiel, A. R.** (2011). Inflammatory links between obesity and metabolic disease. *J. Clin. Invest.* **121**, 2111–7.
- Lumeng, C. N., Bodzin, J. L. and Saltiel, A. R.** (2007). Obesity induces a phenotypic switch in adipose tissue macrophage polarization. *J. Clin. Invest.* **117**, 175–84.
- Luo, J., Quan, J., Tsai, J., Hobensack, C. K., Sullivan, C., Hector, R. and Reaven, G. M.** (1998). Nongenetic mouse models of non-insulin-dependent diabetes mellitus. *Metabolism.* **47**, 663–8.
- Mainardi, M., Scabia, G., Vottari, T., Santini, F., Pinchera, A., Maffei, L., Pizzorusso, T. and Maffei, M.** (2010). A sensitive period for environmental regulation of eating behavior and leptin sensitivity. *Proc. Natl. Acad. Sci. U. S. A.* **107**, 16673–8.
- Marashi, V., Barnekow, A., Ossendorf, E. and Sachser, N.** (2003). Effects of different forms of environmental enrichment on behavioral, endocrinological, and immunological parameters in male mice. *Horm. Behav.* **43**, 281–92.
- Marinho, R., Munõz, V. R., Pauli, L. S. S., Ropelle, E. C. C., de Moura, L. P., Moraes, J. C., Moura-Assis, A., Cintra, D. E., da Silva, A. S. R., Ropelle, E. R., et al.** (2018). Endurance training prevents inflammation and apoptosis in hypothalamic neurons of obese mice. *J. Cell. Physiol.* **234**, 880–890.
- Maurer, S. F., Fromme, T., Grossman, L. I., Hüttemann, M. and Klingenspor, M.** (2015). The brown and brite adipocyte marker *Cox7a1* is not required for non-shivering thermogenesis in mice. *Sci. Rep.* **5**, 17704.
- McDonald, M. W., Hayward, K. S., Rosbergen, I. C. M., Jeffers, M. S. and Corbett, D.** (2018). Is environmental enrichment ready for clinical application in human post-stroke rehabilitation? *Front. Behav. Neurosci.* **12**, 1–16.

- Meng, Z., Liu, T., Song, Y., Wang, Q., Xu, D., Jiang, J., Li, M., Qiao, J., Luo, X., Gu, J., et al.** (2019). Exposure to an enriched environment promotes the terminal maturation and proliferation of natural killer cells in mice. *Brain. Behav. Immun.* **77**, 150–160.
- Moraes, J. C., Coope, A., Morari, J., Cintra, D. E., Roman, E. a, Pauli, J. R., Romanatto, T., Carvalheira, J. B., Oliveira, A. L. R., Saad, M. J., et al.** (2009). High-fat diet induces apoptosis of hypothalamic neurons. *PLoS One* **4**, e5045.
- Morton, G. J., Cummings, D. E., Baskin, D. G., Barsh, G. S. and Schwartz, M. W.** (2006). Central nervous system control of food intake and body weight. *Nature* **443**, 289–95.
- Mowers, J., Uhm, M., Reilly, S. M., Simon, J., Leto, D., Chiang, S.-H., Chang, L. and Saitiel, A. R.** (2013). Inflammation produces catecholamine resistance in obesity via activation of PDE3B by the protein kinases IKK $\epsilon$  and TBK1. *Elife* **2**, e01119.
- Nithianantharajah, J. and Hannan, A. J.** (2006). Enriched environments, experience-dependent plasticity and disorders of the nervous system. *Nat. Rev. Neurosci.* **7**, 697–709.
- Nonogaki, K., Nozue, K. and Oka, Y.** (2007). Social isolation affects the development of obesity and type 2 diabetes in mice. *Endocrinology* **148**, 4658–4666.
- O'Brien, P. D., Hinder, L. M., Callaghan, B. C. and Feldman, E. L.** (2017). Neurological consequences of obesity. *Lancet. Neurol.* **16**, 465–477.
- OECD** (2017). Obesity Update 2017. <https://www.oecd.org/health/health-systems/Obesity-Update-2017.pdf>.
- Ouchi, N., Parker, J. L., Lugus, J. J. and Walsh, K.** (2011). Adipokines in inflammation and metabolic disease. *Nat. Rev. Immunol.* **11**, 85–97.
- Pérez-Martínez, L., Carreón-Rodríguez, A., González-Alzati, M. E., Morales, C., Charli, J. L. and Joseph-Bravo, P.** (1998). Dexamethasone rapidly regulates TRH mRNA levels in hypothalamic cell cultures: interaction with the cAMP pathway. *Neuroendocrinology* **68**, 345–54.
- Pettersen, I. K. N., Tusubira, D., Ashrafi, H., Dyrstad, S. E., Hansen, L., Liu, X., Nilsson, L. I. H., Løvsløtten, N. G., Berge, K., Wergedahl, H., et al.** (2019). Upregulated PDK4 expression is a sensitive marker of increased fatty acid oxidation. *Mitochondrion* **49**, 97–110.

- Pradhan, S.** (2019). The use of commercially available games for a combined physical and cognitive challenge during exercise for individuals with Parkinson's disease—a case series report. *Physiother. Theory Pract.* **35**, 355–362.
- Prado Lima, M. G., Schmidt, H. L., Garcia, A., Daré, L. R., Carpes, F. P., Izquierdo, I. and Mello-Carpes, P. B.** (2018). Environmental enrichment and exercise are better than social enrichment to reduce memory deficits in amyloid beta neurotoxicity. *Proc. Natl. Acad. Sci.* 201718435.
- Reilly, S. M. and Saltiel, A. R.** (2017). Adapting to obesity with adipose tissue inflammation. *Nat. Rev. Endocrinol.* **13**, 633–643.
- Reilly, S. M., Hung, C. W., Ahmadian, M., Zhao, P., Keinan, O., Gomez, A. V., DeLuca, J. H., Dadpey, B., Lu, D., Zaid, J., et al.** (2020). Catecholamines suppress fatty acid re-esterification and increase oxidation in white adipocytes via STAT3. *Nat. Metab.* **2**, 620–634.
- Remmers, F. and Delemarre-van de Waal, H. a** (2011). Developmental programming of energy balance and its hypothalamic regulation. *Endocr. Rev.* **32**, 272–311.
- Rosas-Vargas, H., Martínez-Ezquerro, J. D. and Bienvenu, T.** (2011). Brain-derived neurotrophic factor, food intake regulation, and obesity. *Arch. Med. Res.* **42**, 482–94.
- Rosbergen, I. C. M., Grimley, R. S., Hayward, K. S., Walker, K. C., Rowley, D., Campbell, A. M., McGufficke, S., Robertson, S. T., Trinder, J., Janssen, H., et al.** (2017). Embedding an enriched environment in an acute stroke unit increases activity in people with stroke: A controlled before-after pilot study. *Clin. Rehabil.* **31**, 1516–1528.
- Sabio, G., Das, M., Mora, A., Zhang, Z., Jun, J. Y., Ko, H. J., Barrett, T., Kim, J. K. and Davis, R. J.** (2008). A stress signaling pathway in adipose tissue regulates hepatic insulin resistance. *Science* **322**, 1539–43.
- Sabio, G., Cavanagh-Kyros, J., Barrett, T., Jung, D. Y., Ko, H. J., Ong, H., Morel, C., Mora, A., Reilly, J., Kim, J. K., et al.** (2010). Role of the hypothalamic-pituitary-thyroid axis in metabolic regulation by JNK1. *Genes Dev.* **24**, 256–64.
- Sakakibara, H., Suzuki, A., Kobayashi, A., Motoyama, K., Matsui, A., Sayama, K., Kato, A., Ohashi, N., Akimoto, M., Nakayama, T., et al.** (2012). Social isolation stress induces hepatic hypertrophy in C57BL/6J mice. *J. Toxicol. Sci.* **37**, 1071–1076.



- Salazar-León, J., Valdez-Hernández, A. L., García-Jiménez, S., Román-Domínguez, L., Huanosta-Murillo, E., Bonifaz, L. C., Pérez-Martínez, L. and Pedraza-Alva, G.** (2019). Nlrp1b1 negatively modulates obesity-induced inflammation by promoting IL-18 production. *Sci. Rep.* **9**, 13815.
- Sampedro-Piquero, P. and Begega, A.** (2017). Environmental Enrichment as a Positive Behavioral Intervention Across the Lifespan. *Curr. Neuropharmacol.* **15**, 459–470.
- Schmitz, J., Evers, N., Awazawa, M., Nicholls, H. T., Brönneke, H. S., Dietrich, A., Mauer, J., Blüher, M. and Brüning, J. C.** (2016). Obesogenic memory can confer long-term increases in adipose tissue but not liver inflammation and insulin resistance after weight loss. *Mol. Metab.* **5**, 328–339.
- Seale, P., Conroe, H. M., Estall, J., Kajimura, S., Frontini, A., Ishibashi, J., Cohen, P., Cinti, S. and Spiegelman, B. M.** (2011). Prdm16 determines the thermogenic program of subcutaneous white adipose tissue in mice. *J. Clin. Invest.* **121**, 96–105.
- Song, Y., Gan, Y., Wang, Q., Meng, Z., Li, G., Shen, Y., Wu, Y., Li, P., Yao, M., Gu, J., et al.** (2017). Enriching the Housing Environment for Mice Enhances Their NK Cell Antitumor Immunity via Sympathetic Nerve-Dependent Regulation of NKG2D and CCR5. *Cancer Res.* **77**, 1611–1622.
- Strissel, K. J., Stancheva, Z., Miyoshi, H., Perfield, J. W., DeFuria, J., Jick, Z., Greenberg, A. S. and Obin, M. S.** (2007). Adipocyte death, adipose tissue remodeling, and obesity complications. *Diabetes* **56**, 2910–8.
- Tai, M. M.** (1994). A mathematical model for the determination of total area under glucose tolerance and other metabolic curves. *Diabetes Care* **17**, 152–4.
- Tonelli, J., Kishore, P., Lee, D. E. and Hawkins, M.** (2005). The regulation of glucose effectiveness: How glucose modulates its own production. *Curr. Opin. Clin. Nutr. Metab. Care* **8**, 450–456.
- Tsai, P.-P., Pachowsky, U., Stelzer, H. D. and Hackbarth, H.** (2002). Impact of environmental enrichment in mice. 1: effect of housing conditions on body weight, organ weights and haematology in different strains. *Lab. Anim.* **36**, 411–9.
- Unger, T. J., Calderon, G. a, Bradley, L. C., Sena-Esteves, M. and Rios, M.** (2007). Selective deletion of Bdnf in the ventromedial and dorsomedial hypothalamus of adult mice results in hyperphagic behavior and obesity. *J. Neurosci.* **27**, 14265–74.

- Vandanmagsar, B., Youm, Y.-H., Ravussin, A., Galgani, J. E., Stadler, K., Mynatt, R. L., Ravussin, E., Stephens, J. M. and Dixit, V. D.** (2011). The NLRP3 inflammasome instigates obesity-induced inflammation and insulin resistance. *Nat. Med.* **17**, 179–88.
- Vive, S., Af Geijerstam, J. L., Kuhn, H. G. and Bunketorp-Käll, L.** (2020). Enriched, Task-Specific Therapy in the Chronic Phase after Stroke: An Exploratory Study. *J. Neurol. Phys. Ther.* **44**, 144–155.
- Wasinski, F., Bacurau, R. F. P., Moraes, M. R., Haro, A. S., Moraes-Vieira, P. M. M., Estrela, G. R., Paredes-Gamero, E. J., Barros, C. C., Almeida, S. S., Câmara, N. O. S., et al.** (2013). Exercise and caloric restriction alter the immune system of mice submitted to a high-fat diet. *Mediators Inflamm.* **2013**,.
- Weisberg, S. P., McCann, D., Desai, M., Rosenbaum, M., Leibel, R. L. and Ferrante, A. W.** (2003). Obesity is associated with macrophage accumulation in adipose tissue. *J. Clin. Invest.* **112**, 1796–808.
- Williamson, L. L., Chao, A. and Bilbo, S. D.** (2012). Environmental enrichment alters glial antigen expression and neuroimmune function in the adult rat hippocampus. *Brain. Behav. Immun.* **26**, 500–10.
- Woo, C. C. and Leon, M.** (2013). Environmental enrichment as an effective treatment for autism: A randomized controlled trial. *Behav. Neurosci.* **127**, 487–497.
- Woo, C. C., Donnelly, J. H., Steinberg-Epstein, R. and Leon, M.** (2015). Environmental enrichment as a therapy for autism: A clinical trial replication and extension. *Behav. Neurosci.* **129**, 412–422.
- Xiao, R., Bergin, S. M., Huang, W., Slater, A. M., Liu, X., Judd, R. T., Lin, E.-J. D., Widstrom, K. J., Scoville, S. D., Yu, J., et al.** (2016). Environmental and Genetic Activation of Hypothalamic BDNF Modulates T-cell Immunity to Exert an Anticancer Phenotype. *Cancer Immunol. Res.* **4**, 488–497.
- Xiao, R., Bergin, S. M., Huang, W., Mansour, A. G., Liu, X., Judd, R. T., Widstrom, K. J., Queen, N. J., Wilkins, R. K., Siu, J. J., et al.** (2019). Enriched environment regulates thymocyte development and alleviates experimental autoimmune encephalomyelitis in mice. *Brain. Behav. Immun.* **75**, 137–148.

- Xu, B., Goulding, E. H., Zang, K., Cepoi, D., Cone, R. D., Jones, K. R., Tecott, L. H. and Reichardt, L. F.** (2003). Brain-derived neurotrophic factor regulates energy balance downstream of melanocortin-4 receptor. *Nat. Neurosci.* **6**, 736–42.
- Yehuda-Shnaidman, E., Buehrer, B., Pi, J., Kumar, N. and Collins, S.** (2010). Acute stimulation of white adipocyte respiration by PKA-induced lipolysis. *Diabetes* **59**, 2474–2483.
- Yuan, M., Konstantopoulos, N., Lee, J., Hansen, L., Li, Z. W., Karin, M. and Shoelson, S. E.** (2001). Reversal of obesity- and diet-induced insulin resistance with salicylates or targeted disruption of Ikkbeta. *Science* **293**, 1673–7.
- Zeyda, M., Farmer, D., Todoric, J., Aszmann, O., Speiser, M., Györi, G., Zlabinger, G. J. and Stulnig, T. M.** (2007). Human adipose tissue macrophages are of an anti-inflammatory phenotype but capable of excessive pro-inflammatory mediator production. *Int. J. Obes. (Lond)*. **31**, 1420–8.
- Zhang, X., Zhang, G., Zhang, H., Karin, M., Bai, H. and Cai, D.** (2008). Hypothalamic IKKbeta/NF-kappaB and ER stress link overnutrition to energy imbalance and obesity. *Cell* **135**, 61–73.
- Zhao, H., Shang, Q., Pan, Z., Bai, Y., Li, Z., Zhang, H., Zhang, Q., Guo, C., Zhang, L. and Wang, Q.** (2018). Exosomes From Adipose-Derived Stem Cells Attenuate Adipose Inflammation and Obesity Through Polarizing M2 Macrophages and Beiging in White Adipose Tissue. *Diabetes* **67**, 235–247.

## Figures

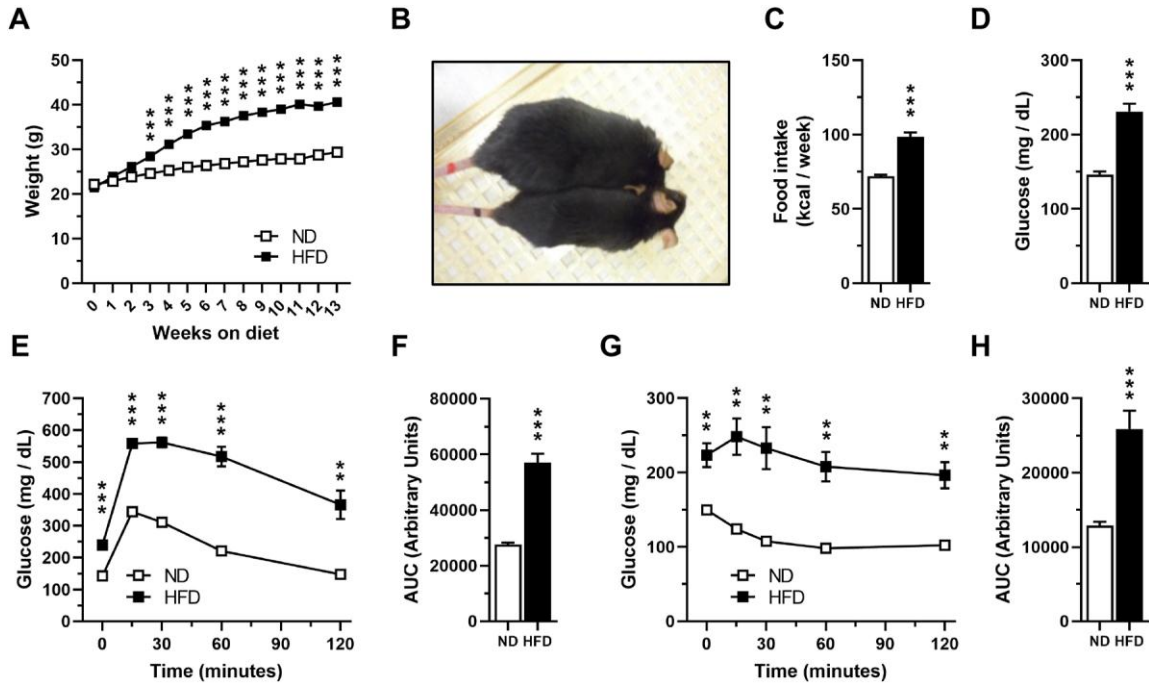

**Figure 1 – High-fat diet feeding induces obesity and metabolic alterations in mice**

C57BL/6N mice were divided to be fed with normal (ND) or high-fat (HFD) diet for 13 weeks in control housing conditions. **(A)** Average weekly weight of mice fed with ND or HFD (ND n=30, HFD n=44). Two-way ANOVA revealed a significant effect for interaction  $F(13, 936) = 124.6$ ,  $P < 0.0001$ ; time on diet  $F(13, 936) = 499.9$ ,  $P < 0.0001$ ; diet  $F(1, 72) = 81.13$ ,  $P < 0.0001$ ; and subject  $F(72, 936) = 65.40$ ,  $P < 0.0001$ . **(B)** Representative photo of a mouse fed with ND (down) and HFD (up) after 13 weeks. **(C)** Average weekly food intake of mice fed with ND or HFD (n=13 weeks).

Mice were fasted for 6 hours to measure blood glucose levels and to perform glucose tolerance test (GTT) or insulin tolerance test (ITT) to corroborate the effects of a HFD feeding on glucose metabolism after 11 weeks of being fed with ND or HFD. **(D)** Fasting blood glucose levels at week 11 (n=20). **(E)** GTT after 11 weeks (n=10). Two-way ANOVA revealed a significant effect for interaction  $(4, 72) = 13.91$ ,  $P < 0.0001$ ; time  $F(1.864, 33.54) = 130.3$ ,  $P < 0.0001$ ; diet  $F(1, 18) = 98.57$ ,  $P < 0.0001$ ; and subject  $F(18, 72) = 5.931$ ,  $P < 0.0001$ . **(F)** Area under the curve (AUC) for the GTT (n=10). **(G)** ITT after 11 weeks (n=10). Two-way ANOVA revealed a significant

effect for interaction  $F(4, 72) = 7.337$ ,  $P < 0.0001$ ; time  $F(2.265, 40.77) = 19.33$ ,  $P < 0.0001$ ; diet  $F(1, 18) = 25.23$ ,  $P < 0.0001$ ; and subject  $F(18, 72) = 33.97$ ,  $P < 0.0001$ . **(H)** AUC for the ITT ( $n=10$ ).

All graphs represent mean  $\pm$  s.e.m. \*  $P < 0.05$ , \*\*  $P < 0.01$ , \*\*\*  $P < 0.001$  vs ND determined by two-way ANOVA followed by a Bonferroni post hoc test (A, E and G) or unpaired t-test (C, D, F and H).

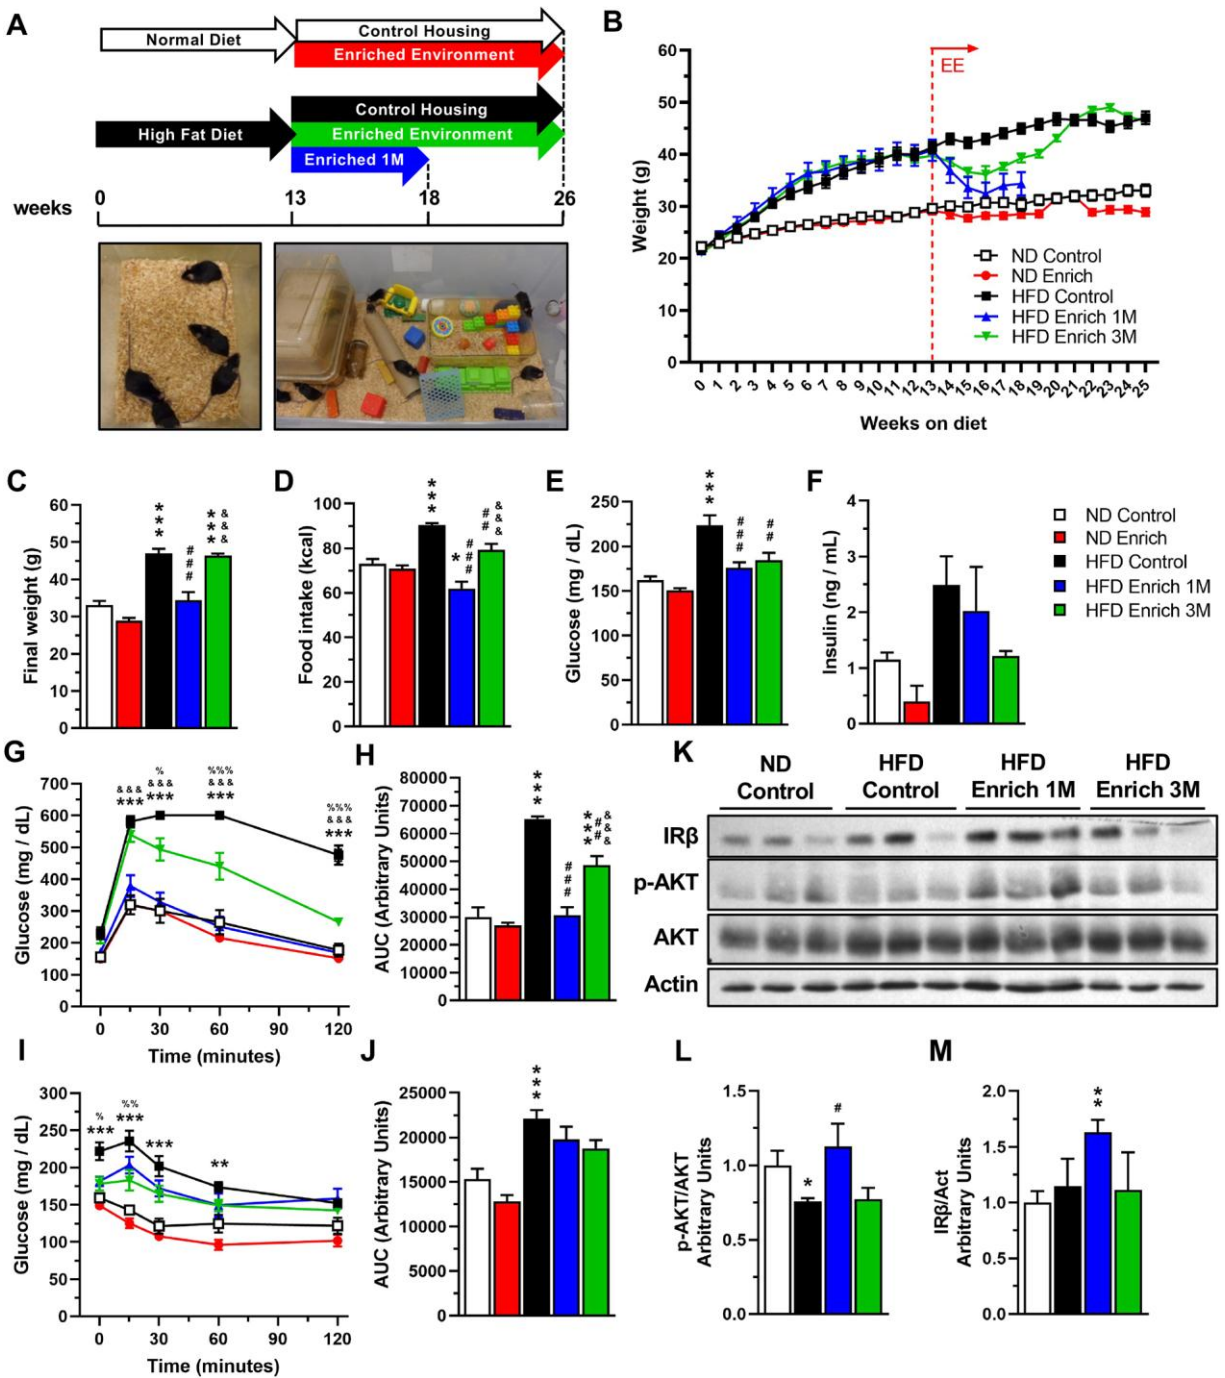

**Figure 2 – An enriched environment ameliorates the metabolic effects caused by a high-fat diet and improves insulin signaling in the liver**

C57BL/6N mice in control housing conditions were fed with normal (ND) or high-fat diet (HFD) for 13 weeks and then separated into control housing or enriched environment (EE) for an additional 5 or 13 weeks. Mice were fed with the same diet they had before they were separated

into different housing conditions. 5 experimental groups were formed: normal diet control housing (ND Control), normal diet enriched environment (ND Enriched), high fat diet control housing (HFD Control) and 2 high fat diet enriched environment (HFD Enriched) groups. Two different time points were used for the HFD Enriched groups: HFD Enriched 1M was maintained for an additional 5 weeks, while the HFD Enriched 3M was maintained for 12 weeks after the change in housing conditions together with the other control groups.

**A)** Experimental design, the dotted lines represent when the mice were euthanized: at 18 (for the HFD Enrich 1M) or 26 weeks (for the ND Control, ND Enrich, HFD Control and HFD Enrich 3M groups). Representative photo of a control housing cage (left) and an enriched environment cage (right) (not to scale).

**B)** Average weekly weight throughout the experiment. The dotted vertical line shows when the mice were separated into the different housing conditions at week 13. (ND Control n=15, ND Enrich n=14, HFD Control n=15, HFD Enrich 1M n=14, HFD Enrich 3M n=15).

**C)** Final weight at week 18 for the HFD Enrich 1M group (n=14), or week 25 for the ND Control (n=15), ND Enrich (n=14), HFD Control (n=15) and HFD Enrich 3M groups (n=15). One-way ANOVA revealed a significant difference between group means  $F(4, 68) = 40.45$ ,  $P < 0.0001$ .

**D)** Weekly average of food intake after the mice were separated into different housing conditions (ND Control, ND Enriched, HFD Control and HFD Enriched 3M n=12 weeks, HFD Enriched 1M n=5 weeks). One-way ANOVA revealed a significant difference between group means  $F(4, 44) = 22.44$ ,  $P < 0.0001$

Mice were fasted for 6 hours to measure blood glucose levels and to perform glucose tolerance test (GTT) or insulin tolerance test (ITT) to determine the effects of the housing conditions on glucose metabolism. The measurements were done at week 17 for the HFD Enriched 1M group or at week 25 for the ND Control, ND Enriched, HFD Control and HFD Enriched 3M groups.

**(E)** Fasting blood glucose levels (n=10). One-way ANOVA revealed a significant difference

between group means  $F(4, 45) = 15.28$ ,  $P < 0.0001$ . **(F)** Fasting serum insulin levels after 18 (HFD Enrich 1M) or 26 (ND Control, ND Enrich, HFD Control and HFD Enrich 3M)

experimental weeks (n=3). One-way ANOVA did not reveal a significant difference between

group means  $F(4, 10) = 3.358$ ,  $P = 0.0547$ . **(G)** GTT (n=5). Two-way ANOVA revealed a significant effect for interaction  $F(16, 80) = 11.79$ ,  $P < 0.0001$ ; time  $F(4, 80) = 219.1$ ,  $P < 0.0001$ ;

group F (4, 20) = 40.19,  $P < 0.0001$ ; and subject F(20, 80) = 6.836,  $P < 0.0001$ . **(H)** Area under the curve (AUC) for the GTT. One-way ANOVA revealed a significant difference between group means  $F(4, 20) = 41.07$ ,  $P < 0.0001$ . **(I)** ITT (ND Control n=10, ND Enrich n=10, HFD Control n=9, HFD Enrich 1M n=5, HFD Enrich 3M n=7). Two-way ANOVA revealed a significant effect for time x group  $F(16, 144) = 4.511$ ,  $P < 0.0001$ ; time  $F(4, 144) = 63.93$ ,  $P < 0.0001$ ; group  $F(4, 36) = 17.64$ ,  $P < 0.0001$ ; and subject  $F(36, 144) = 10.44$ ,  $P < 0.0001$ . **(J)** Area under the curve (AUC) for the ITT. One-way ANOVA revealed a significant difference between group means  $F(4, 36) = 14.49$ ,  $P < 0.0001$ .

**(K)** Representative western blot of proteins of the insulin signaling pathway in liver.

Densitometric analysis of protein levels of phosphorylated AKT Ser473 (p-AKT) **(L)**, and insulin receptor  $\beta$  subunit (IR $\beta$ ) **(M)** (n=6).

Graphs represent mean  $\pm$  s.e.m. \*  $P < 0.05$ , \*\*  $P < 0.01$ , \*\*\*  $P < 0.001$ , \* vs ND Control, # vs HFD Control, & vs HFD Enriched 1M and % vs HFD Enriched 3M determined by two-way ANOVA followed by a Tukey's multiple comparisons test (G and I), one-way ANOVA followed by a Tukey's multiple comparisons test (C, D, E, F, H and J) or unpaired t-test (L and M). Statistical significance against the ND Enriched group is not shown on the graphs for clarity. For (G and I) only comparisons against the HFD Control group are shown in the graph.



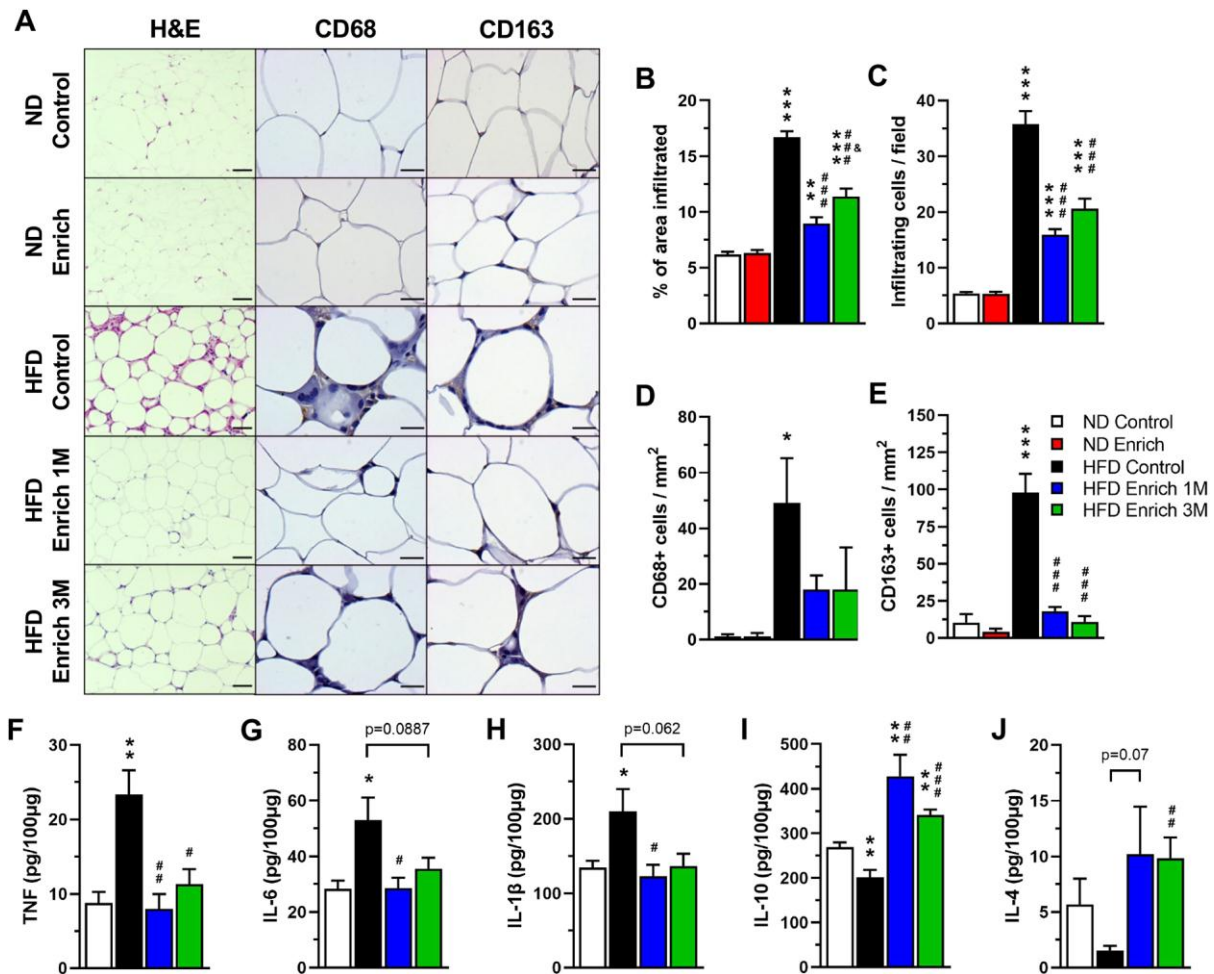

**Figure 3 – An enriched environment reduces cell infiltration and inflammation in the adipose tissue**

**A)** Representative photos of hematoxylin and eosin (H&E) staining and immunohistochemistry for macrophage markers CD68 and CD163 in epididymal white adipose tissue (WAT). Scale bars: 200µm for H&E; 50µm for CD68 and CD163.

Percentage of infiltrated area **(B)** and infiltrating cell count **(C)** in the WAT determined by H&E staining (n=5). One-way ANOVA revealed a significant difference between group means for the infiltrated area ( $F(4, 235) = 66.99, P < 0.0001$ ) and number of infiltrating cells ( $F(4, 235) = 76.38, P < 0.0001$ ).

Number of infiltrating CD68+ cells **(D)** and CD163+ cells **(E)** determined by immunohistochemistry in WAT (n=5). One-way ANOVA did not reveal a significant difference

between group means for the number of CD68+ cells ( $F(4, 20) = 3.694, P=0.0208$ ), but did reveal a significant difference for the number of CD163+ cells ( $F(4, 20) = 34.46, P<0.0001$ ). WAT protein levels of TNF (**F**), IL-6 (**G**), IL-1 $\beta$  (**H**), IL-10 (**I**), and IL-4 (**J**) determined by ELISA. (n=5)

Data represent the mean  $\pm$  s.e.m. \*  $P<0.05$ , \*\*  $P<0.01$ , \*\*\*  $P<0.001$ , \* vs ND Control, # vs HFD Control, & vs HFD Enrich 1M determined by one-way ANOVA followed by a Tukey's multiple comparisons test (B, C, D, and E) or unpaired t-test (F, G, H, I and J). Statistical significance against ND Enrich is not shown on the graphs for clarity.

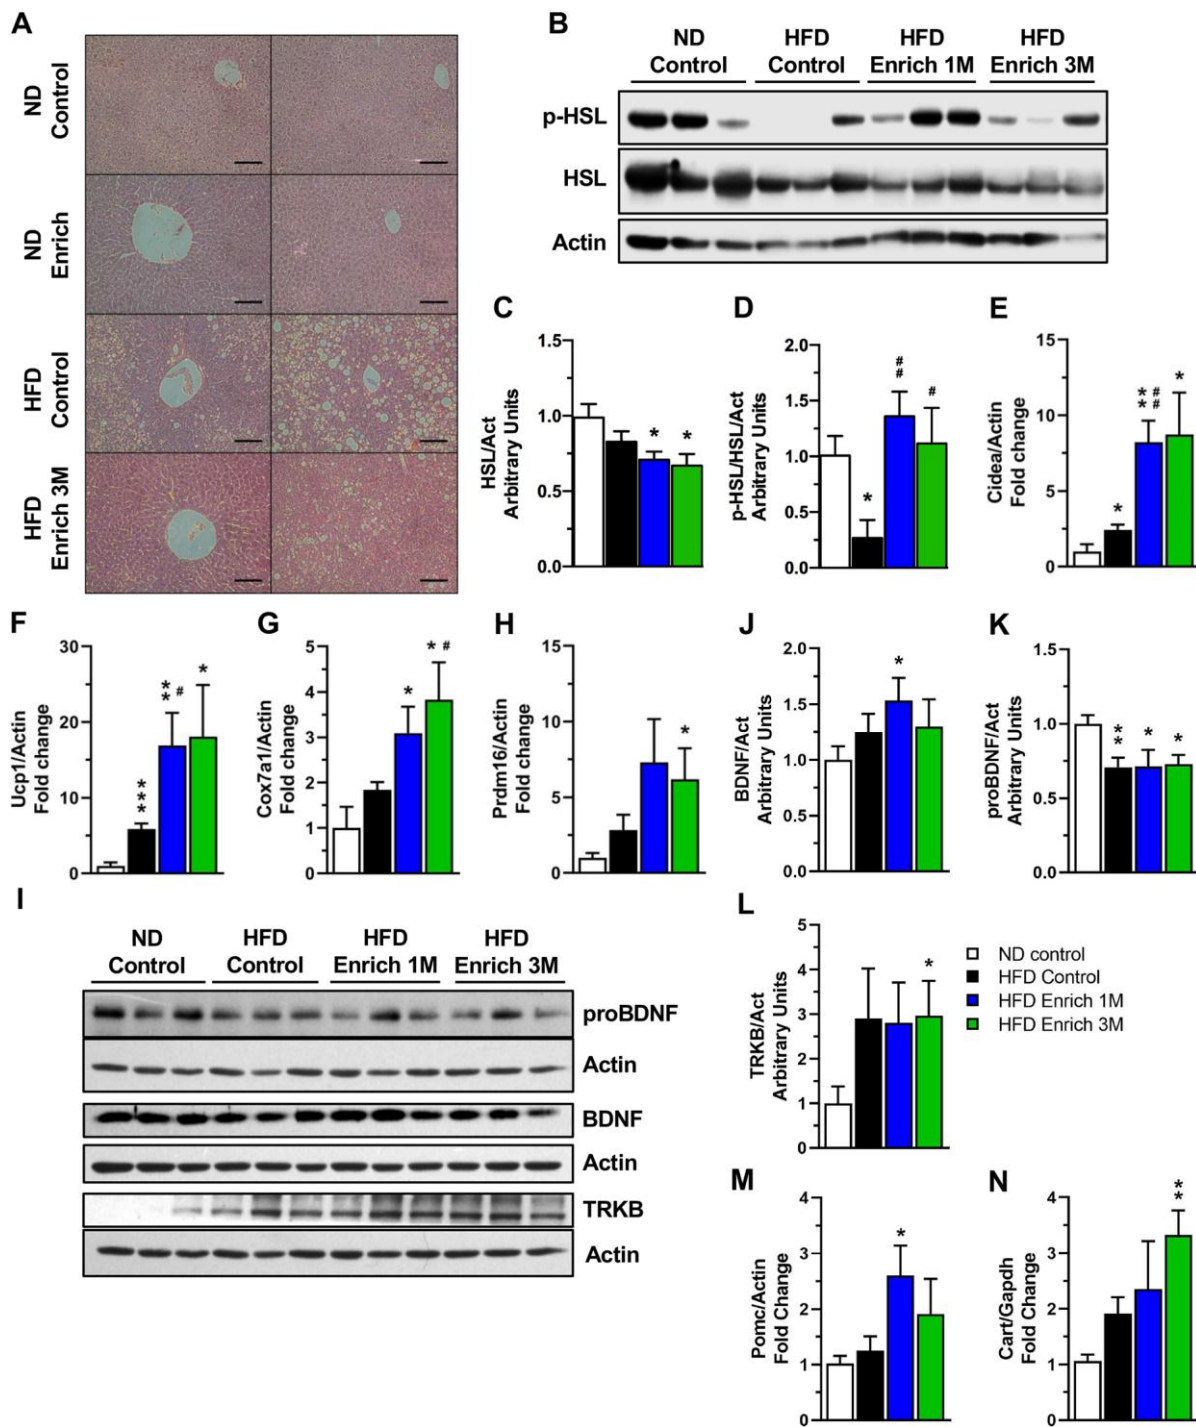

**Figure 4 – An enriched environment reduces hepatic steatosis, promotes white adipose tissue browning and increases anorexigenic markers in the hypothalamus**

**A)** Representative photos of liver hematoxylin and eosin (H&E) staining. Scale bar = 100 $\mu$ m.

**B)** Representative western blot of HSL activation in epididymal white adipose tissue (WAT).

Densitometric analysis of protein levels of total HSL (**C**) and phosphorylated HSL Ser660 (p-HSL) (**D**) in the WAT (n=5).

Gene expression of browning markers *Cidea* (**E**), *Ucp1* (**F**), *Cox7a1* (**G**) and *Prdm16* (**H**) in WAT (n=5).

**I**) Representative western blot of BDNF signaling pathway components in the hypothalamus.

Densitometric analysis of hypothalamic mature BDNF (BDNF) (**J**), BDNF precursor (proBDNF) (**K**), and TRKB (**L**) protein levels (n=6). *Pomc* (**M**) and *Cart* (**N**) gene expression in hypothalamus (n=3). Data represent the mean  $\pm$  s.e.m. \*  $P < 0.05$ , \*\*  $P < 0.01$ , \*\*\*  $P < 0.001$ , \* vs ND Control, # vs HFD Control determined by unpaired t-test.

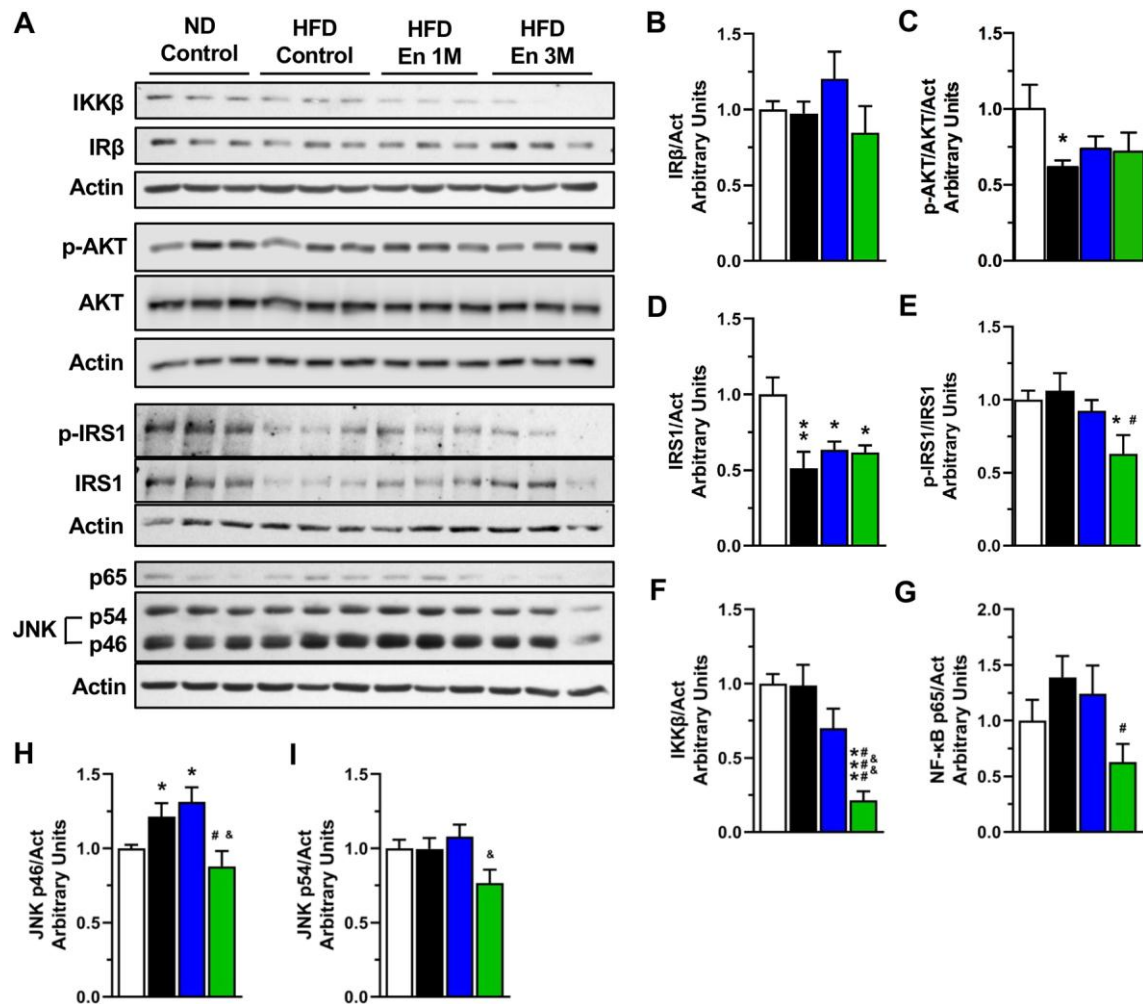

**Figure 5 – An enriched environment reduces hypothalamic inflammatory signaling**

A) Representative western blot of inflammatory and insulin signaling proteins in hypothalamus. Densitometric analysis of insulin receptor  $\beta$  subunit (IR $\beta$ ) (B), phosphorylated AKT Ser473 (p-AKT) (C), IRS1 (D), phosphorylated IRS1 S307 (p-IRS1) (E), IKK $\beta$  (F), NF- $\kappa$ B subunit p65 (G), JNK p46 isoform (H), and JNK p54 isoform (I) protein levels in hypothalamus (n=6). Data represent the mean  $\pm$  s.e.m. \*  $P < 0.05$ , \*\*  $P < 0.01$ , \*\*\*  $P < 0.001$ , \* vs ND Control, # vs HFD Control, & vs HFD Enriched 1M determined by unpaired t-test.

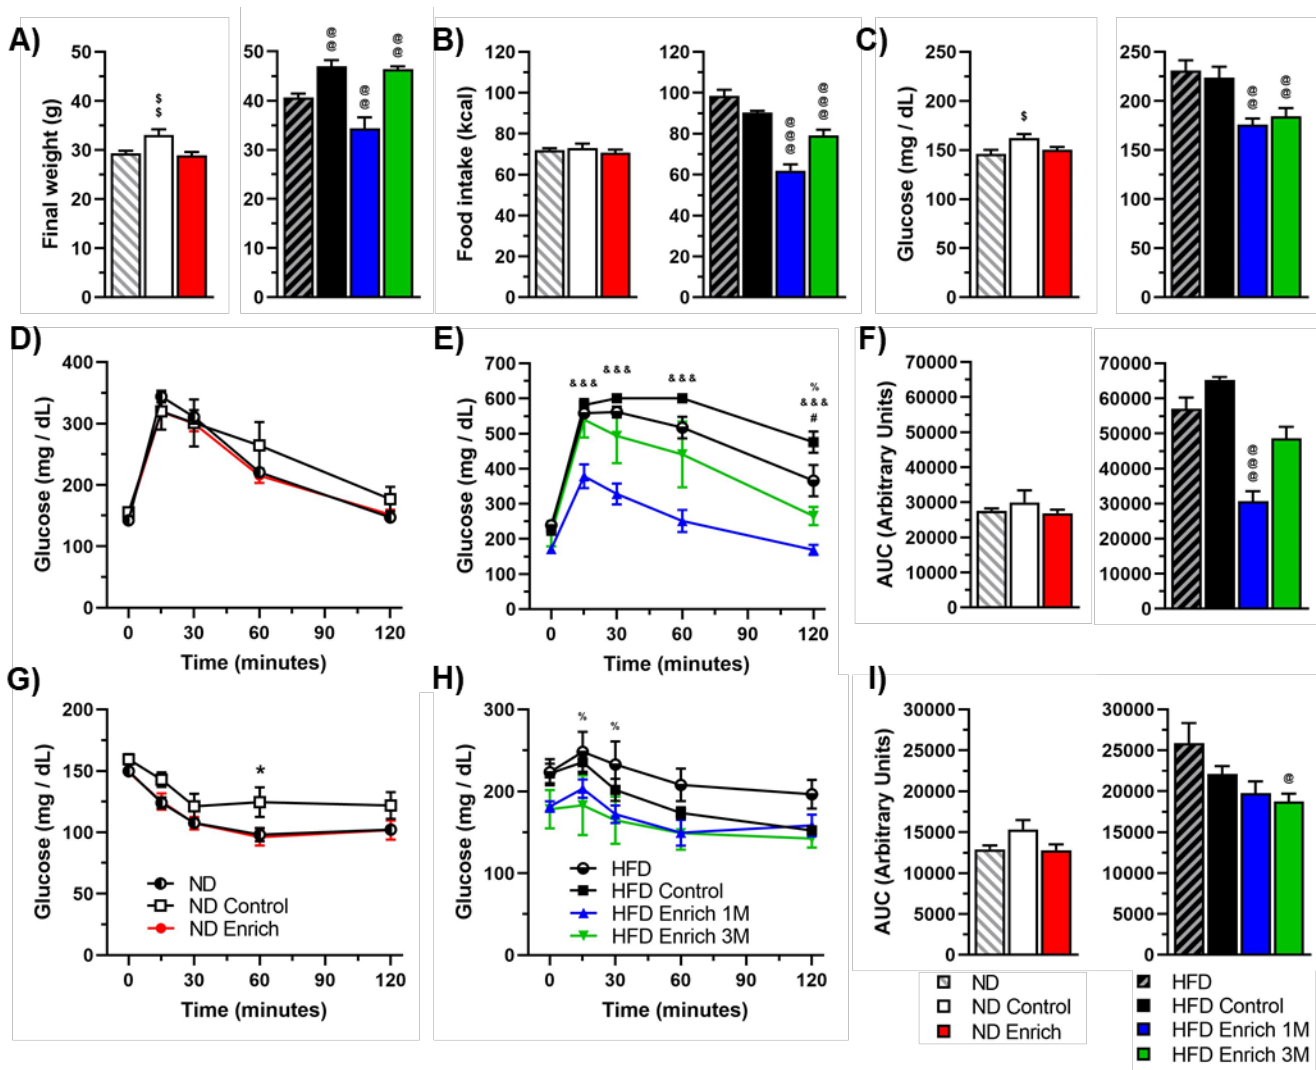

**Fig. S1. Comparison between groups before the change in environmental conditions and at the end of the experiment.**

Mice were fed for 13 weeks with normal (ND) or high-fat diet (HFD) and kept in control housing conditions. After this, mice were fed with the same diet they had before they were separated into different housing conditions. 5 experimental groups were formed: normal diet control housing (ND Control), normal diet enriched environment (ND Enriched), high fat diet control housing (HFD Control) and 2 high fat diet enriched environment (HFD Enriched) groups. Two different time points were used for the HFD Enriched groups: HFD Enriched 1M was maintained for an additional 5 weeks, while the HFD Enriched 3M was maintained for 12 weeks after the change in housing conditions together with the other groups (ND Control, ND Enriched and HFD Control). Final weight (n=14-44 mice) (A) and average weekly food intake (n=5-13 weeks) (B) for mice groups fed with ND (left panels) or HFD (right panels). Data in these graphs represent the values obtained at 13 weeks for ND

and HFD groups, 17 weeks for HFD Enriched 1M group, and 25 weeks for ND Control, ND Enriched, HFD Control and HFD Enriched 3M groups.

Mice were fasted for 6 hours to measure blood glucose levels and to perform glucose tolerance test (GTT) or insulin tolerance test (ITT). **C**) Comparison of fasting blood glucose levels for mice fed with ND diet (left panel) and HFD diet (right panel) (n=10-20). GTT for mice groups fed with ND (**D**) or HFD (**E**) (n=5-10). **F**) Area under the curve for the GTT for the mice groups fed with ND (left panel) or HFD (right panel). ITT for the mice groups fed with ND (**G**) or HFD (**H**) (n=5-10). **I**) Area under the curve for GTT for the mice groups fed with a ND (left panel) or a HFD (right panel). The data presented in **(C-I)** represent the values obtained at 11 weeks for the ND and HFD groups, 17 weeks for the HFD Enriched 1M group, and 25 weeks for the ND Control, ND Enriched, HFD Control and HFD Enriched 3M groups. All graphs represent mean  $\pm$  s.e.m. \*  $P < 0.05$ , \*\*  $P < 0.01$ , \*\*\*  $P < 0.001$ . For (A, B, C, F, and I) comparisons were done between groups of the same diet against the groups before the change in housing condition and statistics were determined by one-way ANOVA followed by a Tukey's multiple comparisons test, \$ vs ND, @ vs HFD. For (D and G) statistics are shown against the ND group before the change in housing conditions determined by two-way ANOVA followed by a Tukey's multiple comparisons test, \* vs ND Control, + vs ND Enriched. For (E and H) statistics are shown against the HFD group before the change in housing conditions determined by two-way ANOVA followed by a Tukey's multiple comparisons test, # vs HFD Control, & vs HFD Enrich 1M and % vs HFD Enriched 3M.

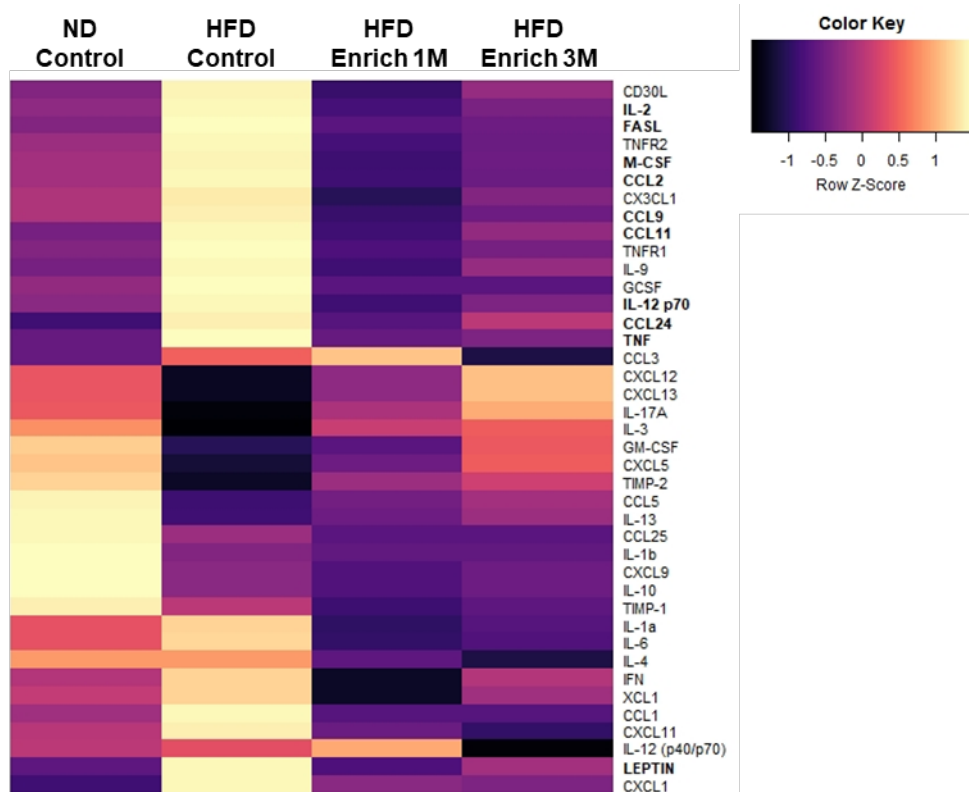

**Fig. S2. An enriched environment reduces cytokine and chemokine levels in the white adipose tissue of obese mice**

Inflammatory protein levels in epididymal white adipose tissue were determined by an antibody array. The groups tested were: Normal Diet (ND) Control housing (Control), High-Fat Diet (HFD) Control, HFD Enriched environment 1 month (Enriched 1M) and HFD Enriched 3M. Protein levels were normalized against ND Control (n=1 mouse per group).



**Table S1. An enriched environment reduces cytokine and chemokine levels in the white adipose tissue of obese mice**

| Molecule        | ND Control | HFD Control | HFD Enrich 1M | HFD Enrich 3M |
|-----------------|------------|-------------|---------------|---------------|
| LEPTIN          | 1          | 4.8         | 0.8           | 1.9           |
| CXCL1           | 1          | 3.5         | 1.6           | 1.5           |
| IL-12 p70       | 1          | 3.3         | 0.3           | 0.9           |
| CCL11           | 1          | 2.9         | 0.6           | 1.2           |
| TNFR1           | 1          | 2.9         | 0.6           | 0.9           |
| G-CSF           | 1          | 2.7         | 0.6           | 0.6           |
| IL-9            | 1          | 2.6         | 0.7           | 1.2           |
| CCL24           | 1          | 2.5         | 1.1           | 1.6           |
| CCL9            | 1          | 2.5         | 0.1           | 0.5           |
| CD30L           | 1          | 2.3         | 0.6           | 1.1           |
| CX3CL1          | 1          | 2.3         | 0.1           | 0.7           |
| IL-2            | 1          | 2.3         | 0.6           | 0.9           |
| M-CSF           | 1          | 2.3         | 0.4           | 0.7           |
| TNFR2           | 1          | 2.3         | 0.5           | 0.7           |
| FASL            | 1          | 2.2         | 0.8           | 0.9           |
| CCL2            | 1          | 2.1         | 0.5           | 0.7           |
| TNF             | 1          | 2.1         | 1             | 1.1           |
| CCL3            | 1          | 2           | 2.6           | 0.5           |
| CXCL11          | 1          | 1.7         | 0.7           | 0.5           |
| CCL1            | 1          | 1.6         | 0.8           | 0.8           |
| IL-6            | 1          | 1.4         | 0.4           | 0.5           |
| XCL1            | 1          | 1.4         | 0.5           | 0.9           |
| IFN $\gamma$    | 1          | 1.3         | 0.7           | 1             |
| IL-1 $\alpha$   | 1          | 1.3         | 0.5           | 0.6           |
| IL-12 (p40/p70) | 1          | 1.1         | 1.3           | 0.5           |
| IL-4            | 1          | 1           | 0.7           | 0.6           |
| CXCL13          | 1          | 0.5         | 0.8           | 1.2           |
| CXCL12          | 1          | 0.5         | 0.8           | 1.2           |
| GM-CSF          | 1          | 0.4         | 0.5           | 0.8           |
| CCL5            | 1          | 0.4         | 0.5           | 0.6           |
| TIMP-1          | 1          | 0.4         | 0             | 0.1           |
| IL-3            | 1          | 0.3         | 0.8           | 0.9           |
| IL-13           | 1          | 0.3         | 0.4           | 0.5           |
| IL-17A          | 1          | 0.3         | 0.8           | 1.2           |
| CXCL5           | 1          | 0.3         | 0.5           | 0.8           |
| CCL25           | 1          | 0.3         | 0.1           | 0.1           |
| TIMP-2          | 1          | 0.3         | 0.6           | 0.7           |
| IL-1 $\beta$    | 1          | 0.2         | 0.1           | 0.1           |
| IL-10           | 1          | 0.2         | 0             | 0.1           |
| CXCL9           | 1          | 0.2         | 0             | 0.1           |

Raw data for supplementary figure 2. Inflammatory protein levels in epididymal white adipose tissue were determined by an antibody array. Groups tested were: Normal Diet (ND) Control housing (Control), High Fat Diet (HFD) Control, HFD Enriched environment 1 month (Enriched 1M) and HFD Enriched 3M. Protein levels were normalized against ND Control (n=1 mouse per group).

**Table S2.** qPCR primers used in this study.

| Gene name     | Transcript ID         | Forward               | Reverse              | Amplicon size (bp) |
|---------------|-----------------------|-----------------------|----------------------|--------------------|
| <i>Actb</i>   | ENSMUST00000100497.10 | CTAAGGCCAACCGTGAAAAG  | CATCACAATGCCTGTGGTAC | 125                |
| <i>Prdm16</i> | ENSMUST00000030902.12 | AGCTGAGGAAGCATTGGAAGT | CGTGGAGAGGAGTGTCTTC  | 140                |
| <i>Ucp1</i>   | ENSMUST00000034146.4  | CTCTCTGCCAGGACAGTAC   | GCTGTTCAAAGCACACAAAC | 149                |
| <i>Cidea</i>  | ENSMUST00000025404.9  | GGAAAAGGGACAGAAATGGAC | CGTGGCTTTGACATTGAGAC | 145                |
| <i>Cox7a1</i> | ENSMUST00000098594.3  | GGCAGAGAAGCAGAAGCTC   | CCAGCCCAAGCAGTATAAGC | 142                |
| <i>Pdk4</i>   | ENSMUST00000019721.6  | GTCAGGTTATGGGACAGACG  | CCTGCTTGGGATACACCAG  | 142                |
| <i>Cart</i>   | ENSMUST00000022150.7  | AGAAGAAGTACGGCCAAGTCC | CACACAGCTTCCCGATCC   | 84                 |
| <i>Pomc</i>   | ENSMUST00000020990.7  | CTCCTGCTTCAGACCTCC    | CAGTCAGGGGCTGTTTCAT  | 169                |
| <i>Gapdh</i>  | ENSMUST00000073605.14 | CATTGTGGAAGGGCTCATGA  | GGAGGCCATGCCAGTGAGC  | 193                |

Cart primer sequences were obtained from (Konieczna et al., 2013).

## References

**Konieczna, J., García, A. P., Sánchez, J., Palou, M., Palou, A. and Picó, C. (2013).** Oral leptin treatment in suckling rats ameliorates detrimental effects in hypothalamic structure and function caused by maternal caloric restriction during gestation. *PLoS One* **8**, e81906.
